# Supplementary material
Source: Royal Society of Chemistry journal article supplement (doi:10.1039/d6gc01022a)
Supplement: d6gc01022a1.pdf [file d6gc01022a1.pdf]

## Supplementary Information

**Structural insight into the stereoselectivity of *R*-selective nitrilase: Reshaping substrate pocket with an “Extend-and-Lock” strategy for efficient Brivaracetam precursor synthesis**

Zhe-Ming Wu<sup>a,b,c</sup>, Xi-Peng Li<sup>c</sup>, Qian-Nan Wu<sup>c</sup>, Yu Lu<sup>c</sup>, Chen-Han Zhuang<sup>d</sup>, Lin-Jie Zhang<sup>c</sup>, Hong-Juan Diao<sup>a,b,c</sup>, Ren-Chao Zheng<sup>\*a,b,c</sup>, and Yu-Guo Zheng<sup>a,b,c</sup>

<sup>a</sup>State Key Laboratory of Green Chemical Synthesis and Conversion, Zhejiang University of Technology, Hangzhou, 310014, China

<sup>b</sup>Engineering Research Center of Bioconversion and Biopurification of Ministry of Education, Zhejiang University of Technology, Hangzhou, 310014, China

<sup>c</sup>Zhejiang Key Laboratory of Bioorganic Synthesis, College of Biotechnology and Bioengineering, Zhejiang University of Technology, Hangzhou, 310014, China

<sup>d</sup>Zhejiang Apeloia Jiayuan Pharmaceutical Co., Ltd., Dongyang, 322118, China

Supporting information for this article is given via a link at the end of the document.

**\*Corresponding author:**

Prof. Ren-Chao Zheng

College of Biotechnology and Bioengineering

Zhejiang University of Technology

18 Chaowang Road, Hangzhou 310014, China

E-mail: zhengrc@zjut.edu.cn

## Table of Contents

|                                                                                                                                                                                                    |           |
|----------------------------------------------------------------------------------------------------------------------------------------------------------------------------------------------------|-----------|
| <b>Table S1.</b> Primes used in this study .....                                                                                                                                                   | <b>4</b>  |
| <b>Table S2.</b> Screened nitrilases in this work .....                                                                                                                                            | <b>5</b>  |
| <b>Table S3.</b> The calculated binding free energy ( $\Delta G_{\text{bind}}$ ) based on MM/PBSA method.....                                                                                      | <b>5</b>  |
| <b>Figure S1.</b> Cartoon diagram of the WT monomer structure.....                                                                                                                                 | <b>6</b>  |
| <b>Figure S2.</b> Results of saturation mutagenesis at position 135.....                                                                                                                           | <b>6</b>  |
| <b>Figure S3.</b> Results of saturation mutagenesis at position 199.....                                                                                                                           | <b>7</b>  |
| <b>Figure S4.</b> Comparison of steric hindrance conferred by residues R199 and Y199.....                                                                                                          | <b>7</b>  |
| <b>Figure S5.</b> Results of saturation mutagenesis at position 59.....                                                                                                                            | <b>8</b>  |
| <b>Figure S6.</b> SDS-PAGE analysis of the <i>PgNIT</i> and its variants. ....                                                                                                                     | <b>8</b>  |
| <b>Figure S7.</b> Michaelis-Menten kinetics of wild-type <i>PgNIT</i> (WT) and its mutants towards substrate <b>1a</b> .....                                                                       | <b>9</b>  |
| <b>Figure S8.</b> Catalytic mechanism of nitrilases.....                                                                                                                                           | <b>10</b> |
| <b>Figure S9.</b> Root mean square deviation (RMSD) of WT-R, WT-S, T59D/F135L/R199W-R and T59D/F135L/R199W-S .....                                                                                 | <b>11</b> |
| <b>Figure S10.</b> Root mean square fluctuation (RMSF) of WT-R, WT-S, T59D/F135L/R199W-R and T59D/F135L/R199W-S .....                                                                              | <b>11</b> |
| <b>Figure S11.</b> Characteristic distance ( $D_{c-s}$ ) representation of WT and T59D/F135L/R199W..                                                                                               | <b>12</b> |
| <b>Figure S12.</b> The distance between the thiol group of the catalytic triad cysteine and the carbon atoms on the cyano group of the substrate ( $D_{c-s}$ ) of the WT and T59D/F135L/R199W..... | <b>12</b> |
| <b>Figure S13.</b> 3D structural sectional view of the enzyme.....                                                                                                                                 | <b>13</b> |
| <b>Figure S14.</b> Interaction diagram of substrate with the active site of WT and T59D/F135L/R199W.....                                                                                           | <b>13</b> |
| <b>Figure S15.</b> Number of hydrogen bonds for residue 59.....                                                                                                                                    | <b>14</b> |
| <b>Figure S16.</b> Hydrogen bond length between residues 61 and 65.....                                                                                                                            | <b>14</b> |
| <b>Figure S17.</b> The fluctuation of the hydrophilic area and the hydrophobic area of T59D/F135L/R199W-R and T59D/F135L/R199W-S.....                                                              | <b>15</b> |
| <b>Figure S18.</b> The reaction process of desymmetrizing hydrolysis of <b>1a</b> by T59D/F135L/R199W.....                                                                                         | <b>15</b> |

|                                                                                                                                                                                                                                                                                  |           |
|----------------------------------------------------------------------------------------------------------------------------------------------------------------------------------------------------------------------------------------------------------------------------------|-----------|
| <b>Figure S19.</b> <sup>1</sup> H NMR of ( <i>R</i> )- <b>2a</b> .....                                                                                                                                                                                                           | <b>16</b> |
| <b>Figure S20.</b> <sup>13</sup> C NMR of ( <i>R</i> )- <b>2a</b> .....                                                                                                                                                                                                          | <b>16</b> |
| <b>Figure S21.</b> <sup>1</sup> H NMR of <b>5</b> .....                                                                                                                                                                                                                          | <b>17</b> |
| <b>Figure S22.</b> <sup>13</sup> C NMR of <b>5</b> .....                                                                                                                                                                                                                         | <b>17</b> |
| <b>Figure S23.</b> RMSD of ( <i>R</i> )- <b>1b</b> binding in WT, ( <i>S</i> )- <b>1b</b> binding in WT, ( <i>R</i> )- <b>1b</b> binding in T59D/F135L/R199W and ( <i>S</i> )- <b>1b</b> binding in T59D/F135L/R199W .....                                                       | <b>18</b> |
| <b>Figure S24.</b> Surface diagram of characteristic structure representation of ( <i>R</i> )- <b>1b</b> binding in WT, ( <i>S</i> )- <b>1b</b> binding in WT, ( <i>R</i> )- <b>1b</b> binding in T59D/F135L/R199W and ( <i>S</i> )- <b>1b</b> binding in T59D/F135L/R199W ..... | <b>19</b> |
| <b>Figure S25.</b> GC analysis of the kinetic resolution of <b>1a</b> by WT and T59D/F135L/R199W.. .....                                                                                                                                                                         | <b>20</b> |
| <b>Figure S26.</b> GC analysis of the kinetic resolution of <b>1b</b> by WT and T59D/F135L/R199W.....                                                                                                                                                                            | <b>21</b> |
| <b>Figure S27.</b> GC analysis of the kinetic resolution of <b>1c</b> by WT and T59D/F135L/R199W.....                                                                                                                                                                            | <b>22</b> |
| <b>Figure S28.</b> HPLC analysis of the kinetic resolution of <b>1d</b> by WT and T59D/F135L/R199W.                                                                                                                                                                              | <b>23</b> |
| <b>Figure S29.</b> GC analysis of the kinetic resolution of <b>1e</b> by WT and T59D/F135L/R199W.....                                                                                                                                                                            | <b>23</b> |
| <b>Figure S30.</b> HPLC analysis of the kinetic resolution of <b>1f</b> by WT and T59D/F135L/R199W.                                                                                                                                                                              | <b>24</b> |
| <b>Figure S31.</b> HPLC analysis of the kinetic resolution of <b>1g</b> by WT and T59D/F135L/R199W.                                                                                                                                                                              | <b>24</b> |
| <b>Figure S32.</b> GC analysis of the kinetic resolution of <b>1h</b> by WT and T59D/F135L/R199W.....                                                                                                                                                                            | <b>25</b> |
| <b>Figure S33.</b> HPLC analysis of the kinetic resolution of <b>1j</b> by WT and T59D/F135L/R199W...                                                                                                                                                                            | <b>25</b> |
| <b>Figure S34.</b> Comparison of different synthetic routes to the key intermediate of Brivaracetam. ....                                                                                                                                                                        | <b>26</b> |
| The DNA sequence of <i>PgNIT</i> and other main variants.....                                                                                                                                                                                                                    | <b>26</b> |

**Table S1.** Primers used in this study.

| <b>Amino acid sites</b> | <b>Primers (5'→3')</b>                                                                           |
|-------------------------|--------------------------------------------------------------------------------------------------|
| <b>A55</b>              | F: CCCGTATTT <b>CNNK</b> GCGAGTTCAGACTGGT<br>R: TCTGAACTG <b>CMNN</b> GAAATACGGGTAGTA            |
| <b>A56</b>              | F: CGTATTT <b>CGCTNNK</b> GTTTCAGACTGGTATCGA<br>R: CCAGTCTGAAC <b>MNN</b> AGCGAAATACGGGTAGT      |
| <b>T133</b>             | F: ACCCC <b>ANNK</b> CACTTCGAACGTATGATTT<br>R: ACGTTCGAAGT <b>GMNNT</b> GGGGTGATAAA              |
| <b>F135</b>             | F: ACCCCA <b>ACTCACNNK</b> GAACGTATGATTTGGGGT<br>R: CACATCGT <b>TCMNN</b> GTGAGTTGGGGTGATTTTACG  |
| <b>F192</b>             | F: CCGGGCAGCG <b>CTNNK</b> GGCGAAGGTTTTGCGCAG<br>R: AAAACCTTCG <b>CCMNN</b> AGCGCTGCCCGGATACAT   |
| <b>F164</b>             | F: CTGGCGTGT <b>NNK</b> GAACATAACAACCCAC<br>R: GTTATGTT <b>CGAAMNN</b> CGCCAGCTGACCA             |
| <b>R199</b>             | F: GGTTTTGCGCAG <b>NNK</b> ATGGAAATCAACATTCGTCAG<br>R: GATTTCCAT <b>MNN</b> CTGCGCAAACCTTCGCCAAA |
| <b>Q58</b>              | F: TATTT <b>CGCTGCAGTTNNK</b> GACGGTATCG<br>R: CAGCTCGATACCGT <b>CMNNA</b> ACTGCAGCG             |
| <b>T59</b>              | F: GCTGCAGTTCAG <b>NNK</b> GGTATCGAGCTGCTG<br>R: TCAGCAGCTCGATAC <b>MNN</b> CTGAACTGCAG          |
| <b>G60</b>              | F: GCTGCAGTTCAGGAC <b>NNK</b> ATCGAGCTGC<br>R: GCTCAGCAGCTCGAT <b>MNN</b> GCCTGAACT              |
| <b>I61</b>              | F: GCAGTTCAGGACGGT <b>NNK</b> GAGCTGCTGAG<br>R: ACCGCTCAGCAGCT <b>CMNN</b> ACCGTCCTGA            |
| <b>E62</b>              | F: GTTCAGGACGGTAT <b>CNNK</b> CTGCTGAGCG<br>R: GGAACCGCTCAGCAG <b>MNN</b> GATACCGTCC             |
| <b>L63</b>              | F: CAGGACGGTATCGAG <b>NNK</b> CTGAGCGGTT<br>R: TTCGGAACCGCTCAG <b>MNN</b> CTCGATACCG             |
| <b>L64</b>              | F: GACGGTATCGAGCT <b>GNNK</b> AGCGGTTCCG<br>R: GTGTT <b>CGGAACCGTMMN</b> CAGCTCGATA              |
| <b>S65</b>              | F: GGTATCGAGCTGCT <b>GNNK</b> GGTTCCGAAC<br>R: CAGGTGTT <b>CGGAACCMNN</b> CAGCAGCTCG             |
| <b>K281</b>             | F: ACAGATCGATCGTCG <b>TNNK</b> ATGCTGATGGA<br>R: CAGCGTCCATCAGCAT <b>MNN</b> ACGACGATCGA         |
| <b>M282</b>             | F: ATCGATCGTCGTAA <b>ANNK</b> CTGATGGACG<br>R: GGCAGCGTCCATCAG <b>MNN</b> TTTACGACGA             |
| <b>L283</b>             | F: GATCGTCGTAAAAT <b>GNNK</b> ATGGACGCTG<br>R: ACCGGCAGCGTCCAT <b>MNN</b> CATTTTACGA             |
| <b>M284</b>             | F: CGTCGTAAAATGCT <b>GNNK</b> GACGCTGCCGG<br>R: ATGACCGGCAGCGT <b>CMNN</b> CAGCATTTTAC           |

**Table S2.** Screened nitrilases in this work.

| <b>Nitrilases</b>         | <b>Source</b>                         | <b>Accession</b> | <b>Stereoselectivity</b> | <b>E</b> |
|---------------------------|---------------------------------------|------------------|--------------------------|----------|
| <b>AfNIT-1</b>            | <i>Alcaligenes faecalis</i>           | WP_236780549.1   | R                        | 3.8      |
| <b>AfNIT</b>              | <i>Arabidopsis thaliana</i>           | CAD5324840.1     | R                        | 3.7      |
| <b>BnNIT</b>              | <i>Brassica napus</i>                 | J4E87_006048     | S                        | 4.6      |
| <b>OsNIT</b>              | <i>Oryza sativa</i>                   | NC_029258.1      | Nd                       | Nd       |
| <b>BrNIT</b>              | <i>Brassica rapa</i>                  | BAG72074.1       | R                        | 4.5      |
| <b>EsNIT</b>              | <i>Eutrema salsugineum</i>            | NW_006256829.1   | R                        | 6.0      |
| <b>AaNIT</b>              | <i>Arabis alpina</i>                  | KFK44999         | R                        | 4.4      |
| <b>KpNIT</b>              | <i>Klebsiella pneumoniae</i>          | P10045.1         | Nd                       | Nd       |
| <b>RzNIT</b>              | <i>Rhodococcus zopfii</i>             | WP_138999863     | R                        | 3.4      |
| <b>GpNIT</b>              | <i>Geobacillus pallidus</i>           | ABH04285         | Nd                       | Nd       |
| <b>ApNIT</b>              | <i>Arthrobacter pascens</i>           | BAJ17399         | R                        | 1.2      |
| <b>AfNIT-2</b>            | <i>Acidovorax facilis</i>             | WP_236780549.1   | Nd                       | Nd       |
| <b>PgNIT</b>              | <i>Paraburkholderia graminis</i>      | QCT24552.1       | R                        | 15       |
| <b>BaNIT<sub>M2</sub></b> | <i>Chimera</i>                        | /                | S                        | 84       |
| <b>PsNIT</b>              | <i>Pseudomonas</i>                    | WP_153649688.1   | Nd                       | Nd       |
| <b>RrNIT</b>              | <i>Rhodococcus rhodochrous</i><br>K22 | BAA02127         | S                        | 5.3      |
| <b>BjNIT</b>              | <i>Bradyrhizobium japonicum</i>       | HXT67_RS08040    | S                        | 2.4      |

Nd= Not detected.

**Table S3.** The calculated binding free energy ( $\Delta\Delta G_{\text{bind}}$ ) based on MM/PBSA method.

| <b>Potential site</b>                            | E45    | Y51   | A55    | A56   | K129   | T133   |
|--------------------------------------------------|--------|-------|--------|-------|--------|--------|
| <b><math>\Delta\Delta G_{\text{bind}}</math></b> | -1.628 | 2.209 | -3.254 | 1.591 | 4.424  | -3.986 |
| <b>Potential site</b>                            | F135   | E136  | C163   | F164  | Y187   | P188   |
| <b><math>\Delta\Delta G_{\text{bind}}</math></b> | -4.424 | 4.648 | 1.036  | 2.629 | -0.425 | -0.651 |
| <b>Potential site</b>                            | F192   | F196  | R199   | M200  |        |        |
| <b><math>\Delta\Delta G_{\text{bind}}</math></b> | 7.546  | 4.361 | 6.339  | 0.232 |        |        |

Based on MD trajectories, the difference in MMPBSA energy decomposition between WT and (R)-/(S)-**1a** is defined as  $\Delta\Delta G_{\text{bind}} = \Delta G_{\text{bind}}(\text{R}) - \Delta G_{\text{bind}}(\text{S})$ .

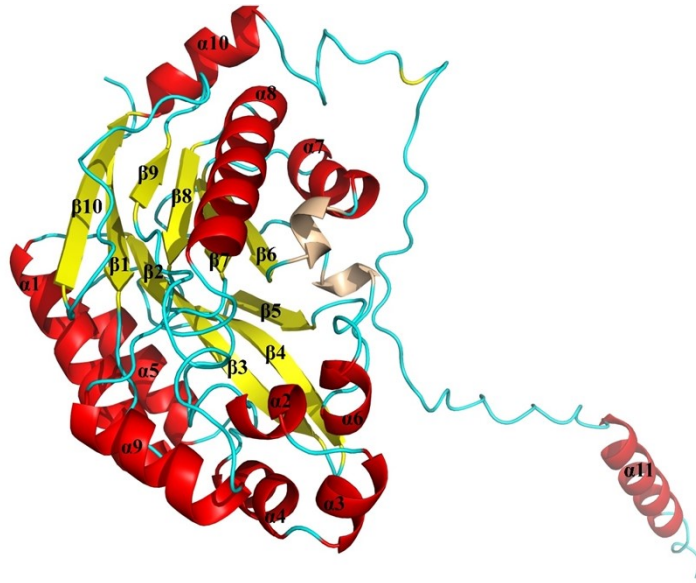

**Figure S1.** Cartoon diagram of the WT monomer structure. The  $\alpha$ -helices are presented in red, while the  $\beta$ -strands are presented in yellow.

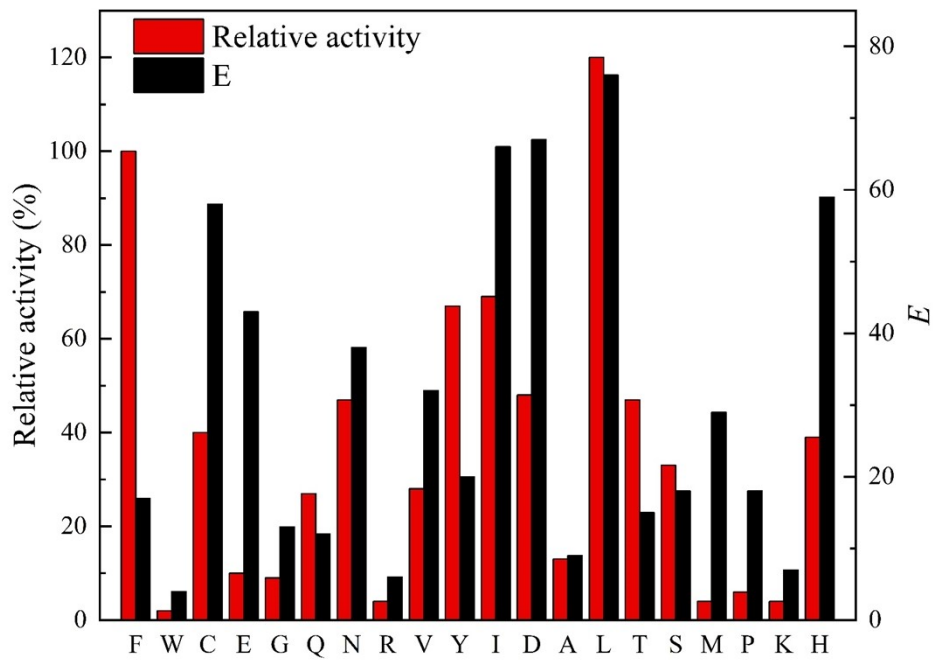

**Figure S2.** Results of saturation mutagenesis at position 135. The relative activities are shown in red, and the  $E$  values are shown in black.

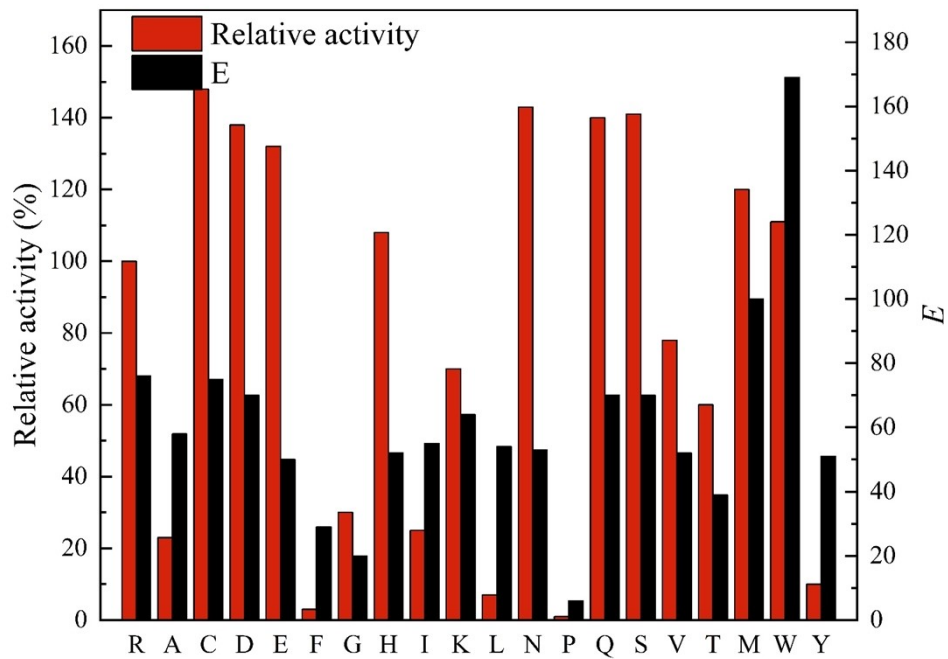

**Figure S3.** Results of saturation mutagenesis at position 199. The relative activities are shown in red, and the *E* values are shown in black.

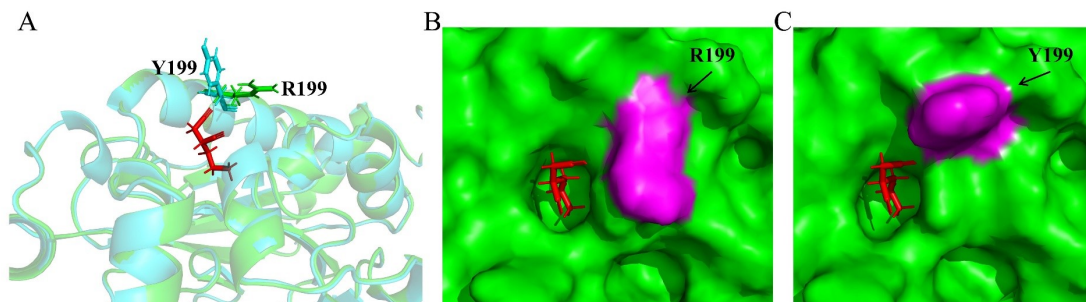

**Figure S4.** Comparison of steric hindrance conferred by residues R199 and Y199. (A) Structural superposition of R199 and Y199. (B) Surface representation of the steric effect exerted by R199 on the substrate. (C) Surface representation of the steric effect exerted by Y199 on the substrate. The substrates are represented as red stick models.

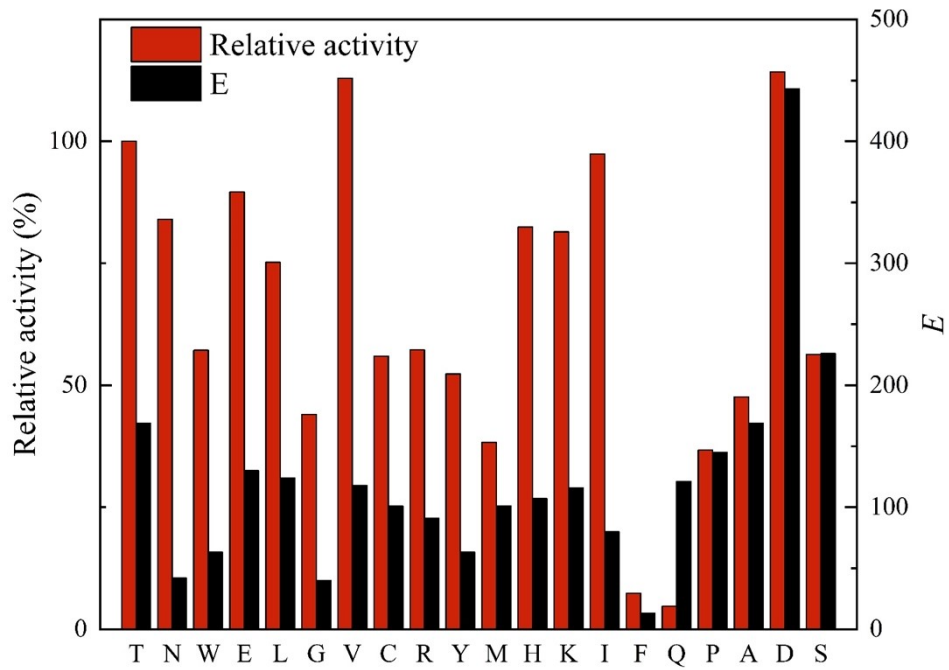

**Figure S5.** Results of saturation mutagenesis at position 59. The relative activities are shown in red, and the *E* values are shown in black.

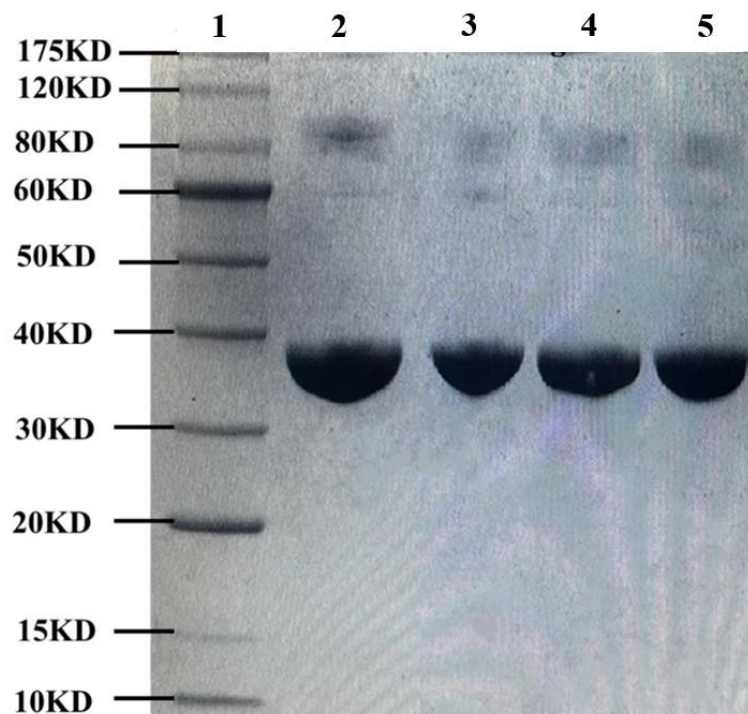

**Figure S6.** SDS-PAGE analysis of the *PgNIT* and its variants. Lane 1, the protein molecular weight maker; lane 2: *PgNIT*; lane 3: F135L; lane 4 : F135L/R199W; lane 5: T59D/F135L/R199W.

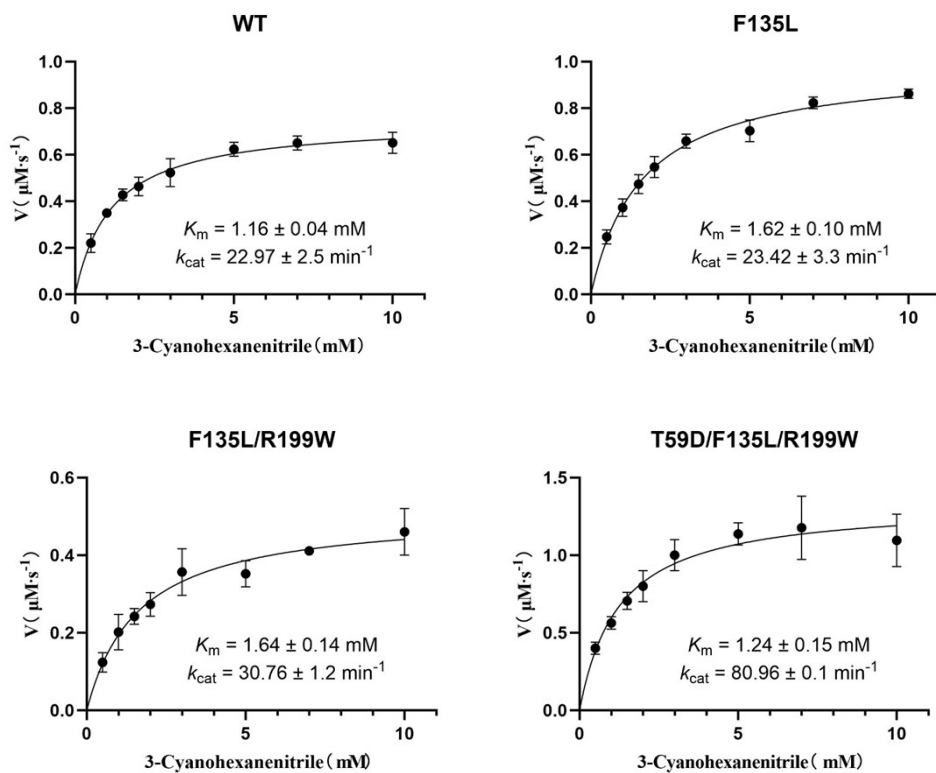

**Figure S7.** Michaelis-Menten kinetics of wild-type *PgNIT* (WT) and its mutants towards substrate **1a**.

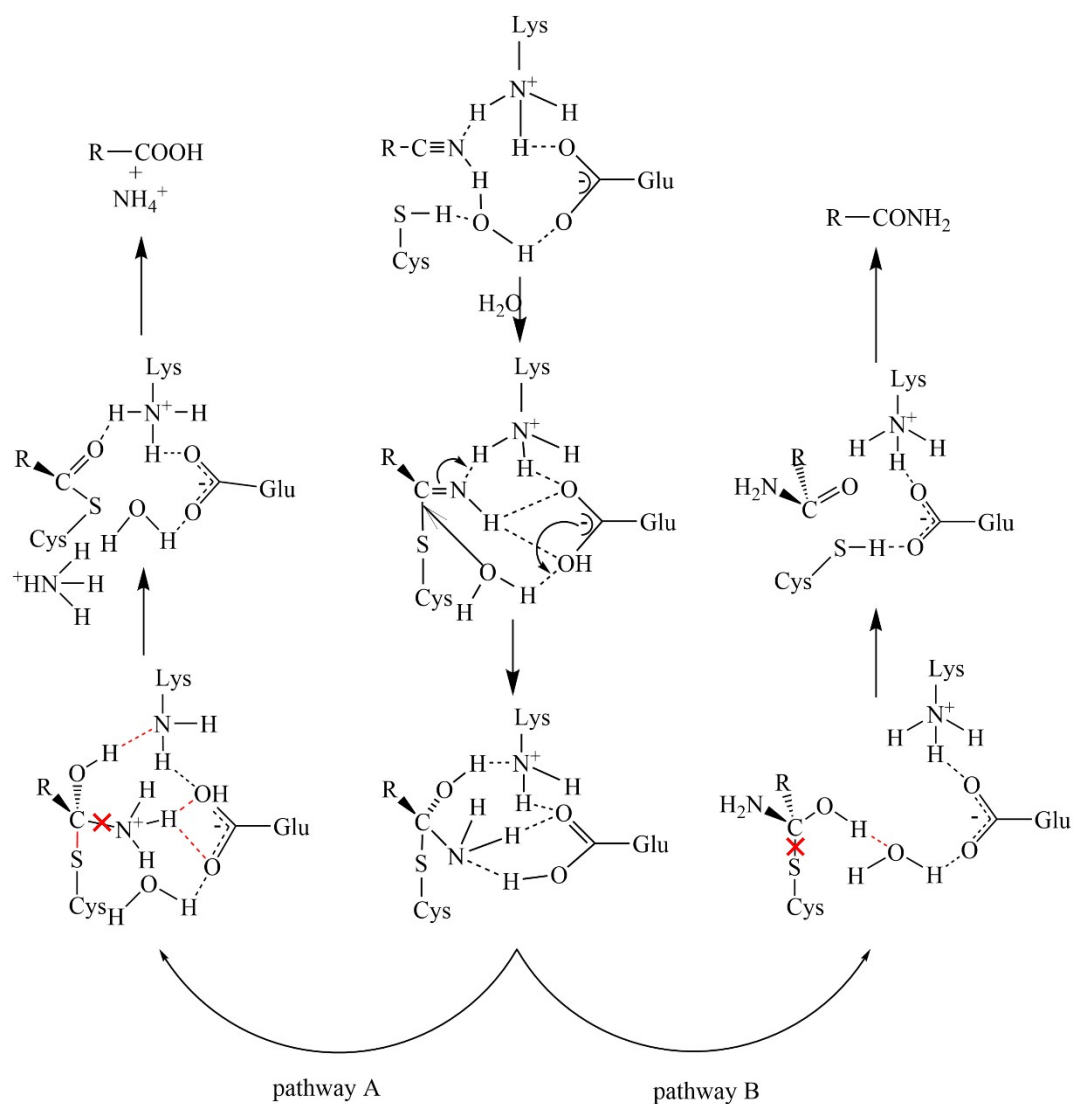

**Figure S8.** Catalytic mechanism of nitrilases. Nitrilases typically contain conserved catalytic residues Glu, Lys and Cys. Upon substrate entry into the active site, the thiol group of the Cys residue initially attacks the carbon atom of the substrate's cyano group, forming an enzyme-thioimidate complex. Subsequently, the Glu residue provides a proton that transfers to the enzyme-thioimidate complex; protonation of the nitrogen atom eliminates the imine structure, releasing  $NH_4^+$  and generating one carboxylic acid molecule (pathway A). The proton donated by Glu combines with a solvent water molecule to form a nucleophile that attacks the intermediate. This transfers a proton to the Cys residue, hydrolyzing the thioester bond at the carbon of the cyano group to produce one amide molecule.

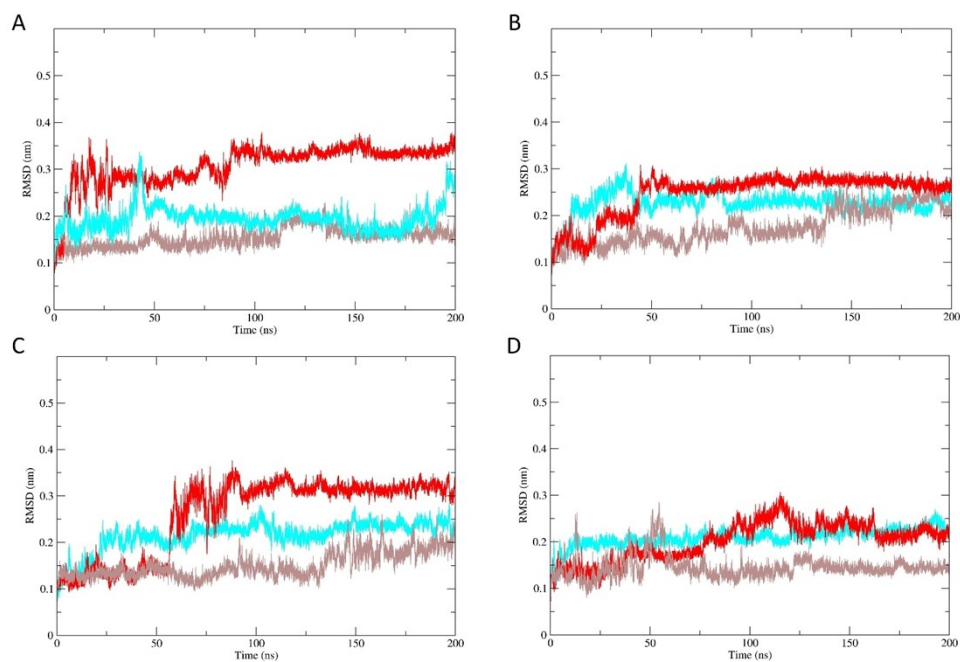

**Figure S9.** Root mean square deviation (RMSD) of WT-R (A), WT-S (B), T59D/F135L/R199W-R (C) and T59D/F135L/R199W-S (D). The RMSD was calculated from 200 ns MD simulation. All the MD simulations were repeated three independent times.

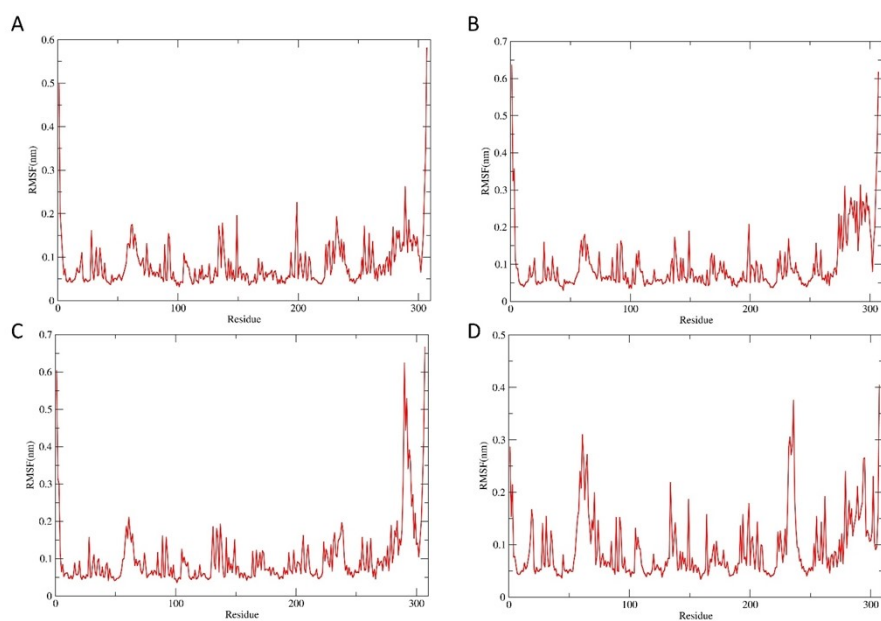

**Figure S10.** Root mean square fluctuation (RMSF) of WT-R (A), WT-S (B), T59D/F135L/R199W-R (C) and T59D/F135L/R199W-S (D). The residues were determined from last 50 ns of molecular dynamics (MD) simulations.

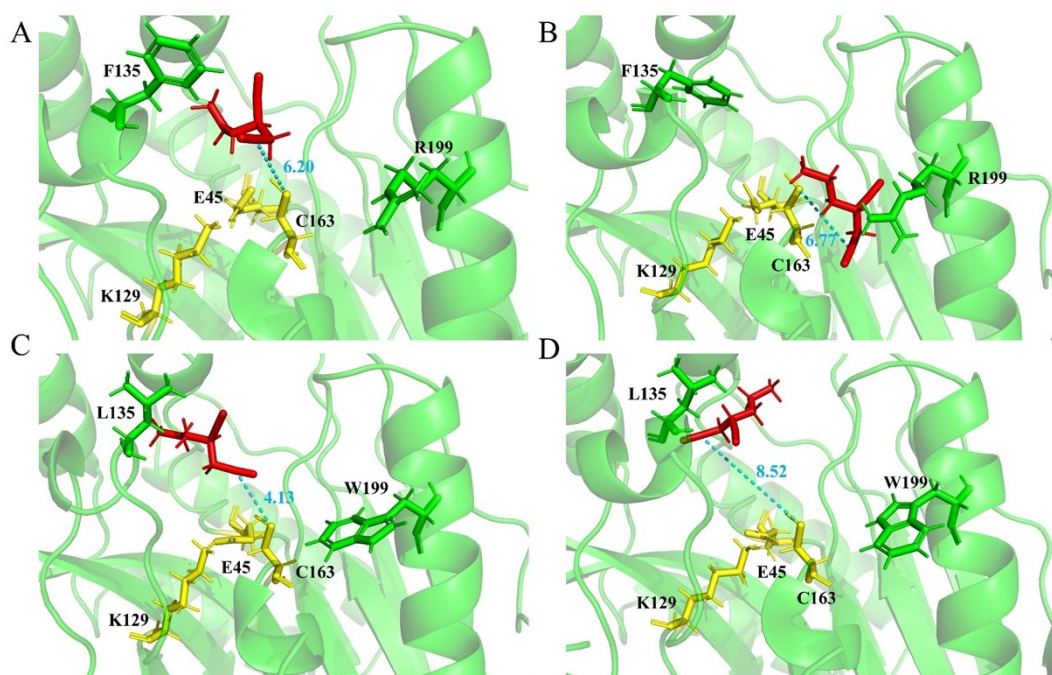

**Figure S11.** Characteristic distance ( $D_{c-s}$ ) representation of WT-R (A), WT-S (B), T59D/F135L/R199W-R (C), T59D/F135L/R199W-S (D). The catalytic triad residues E45, K129, and C163 are represented as yellow stick models, other residues as green stick models and cartoon representations, and substrate **1a** as red stick models.

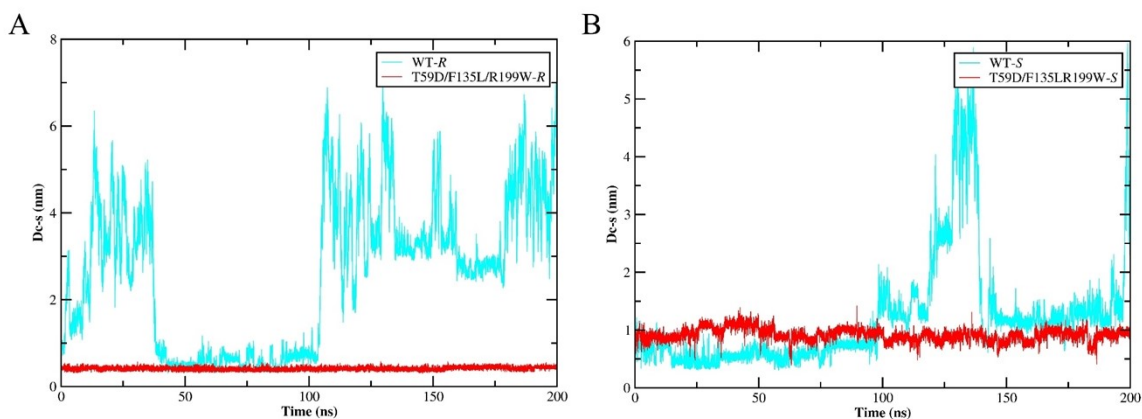

**Figure S12.** The distance between the thiol group of the catalytic triad cysteine and the carbon atoms on the cyano group of the substrate ( $D_{c-s}$ ) of the WT and T59D/F135L/R199W. (A) MD simulations of  $D_{c-s}$  for WT-R and T59D/F135L/R199W-R. (B) MD simulations of  $D_{c-s}$  for WT-S and T59D/F135L/R199W-S.

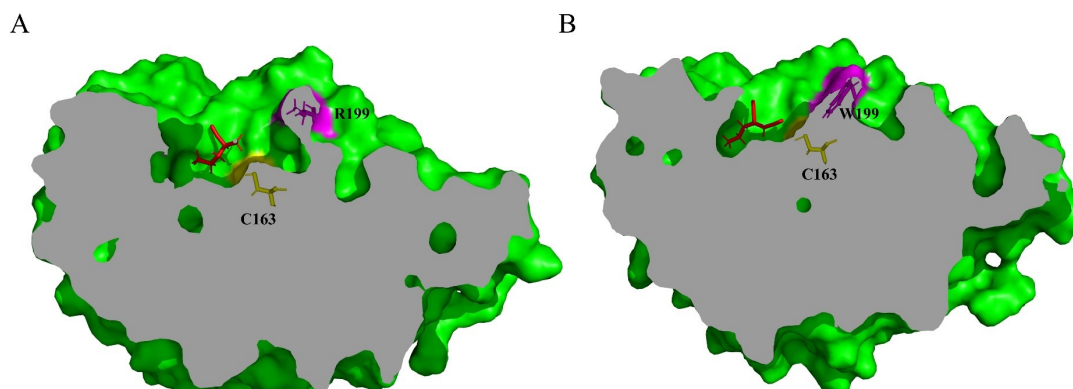

**Figure S13.** 3D structural sectional view of the enzyme. (A) The sectional view of WT-R. (B) The sectional view of T59D/F135L/R199W-R. The catalytic triad residue C163 is represented as yellow stick models, the mutant residue is represented as magenta stick models, and the substrate is represented as red stick models.

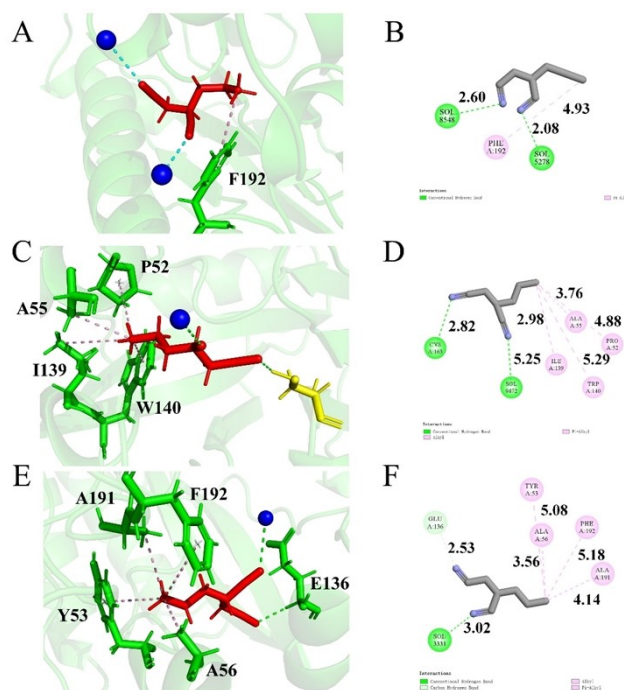

**Figure S14.** Interaction diagram of substrate with the active site of WT and T59D/F135L/R199W. (A) Interaction between (*R*)-**1a** (red) and WT (green). (B) 2D ligand interaction diagram of (*R*)-**1a** with WT. (C) Interaction between (*R*)-**1a** (red) and T59D/F135L/R199W (green cartoon). (D) 2D ligand interaction diagram of (*R*)-**1a** with T59D/F135L/R199W. (E) Interaction between (*S*)-**1a** (red) and T59D/F135L/R199W (green cartoon). (F) 2D ligand interaction diagram of (*S*)-**1a** with T59D/F135L/R199W. Water molecules are represented as blue spheres, hydrogen bonds are depicted as green dashed lines, and  $\pi$ -interactions are depicted as pink dashed lines.

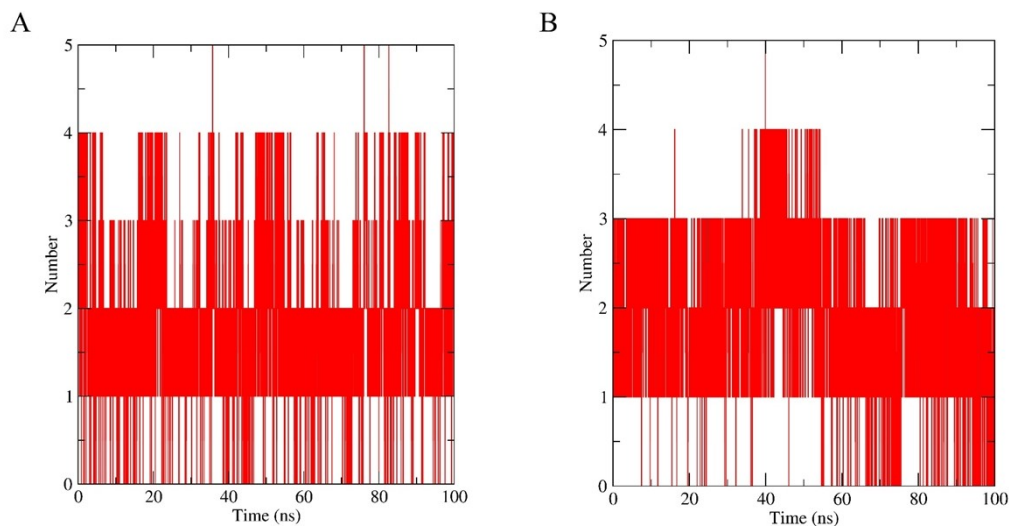

**Figure S15.** Number of hydrogen bonds for residue 59. (A) Number of hydrogen bonds formed between T59 and surrounding residues in the WT. (B) Number of hydrogen bonds formed between D59 and surrounding residues in T59D/F135L/R199W.

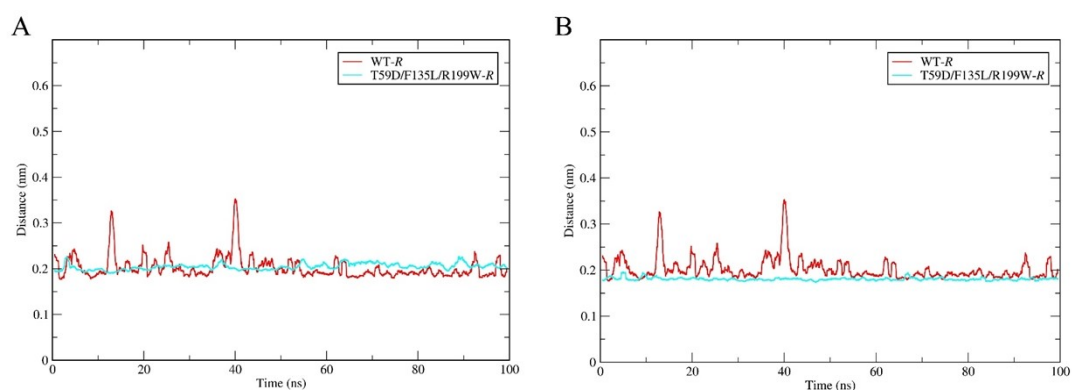

**Figure S16.** Hydrogen bond length between residues 61 and 65. (A) The fluctuation of the hydrogen bond length between the N-H of residue 65 and the O of residue 61. (B) The fluctuation of the hydrogen bond length between the O-H of residue 65 and the O of residue 61.

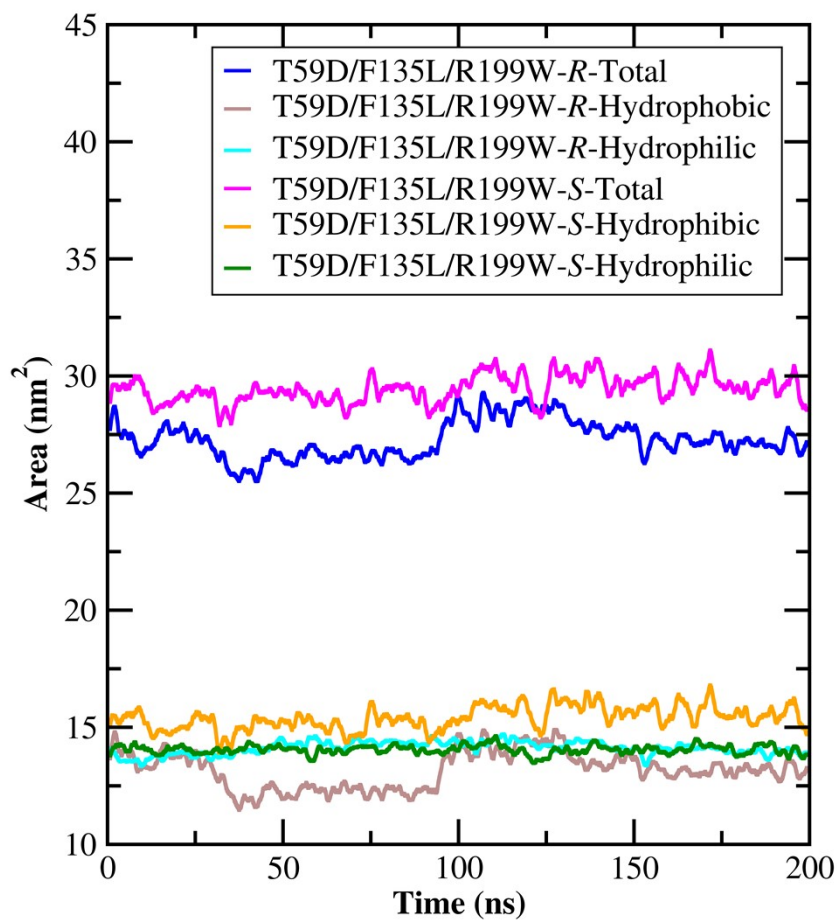

**Figure S17.** The fluctuation of the hydrophilic area and the hydrophobic area of T59D/F135L/R199W-R and T59D/F135L/R199W-S.

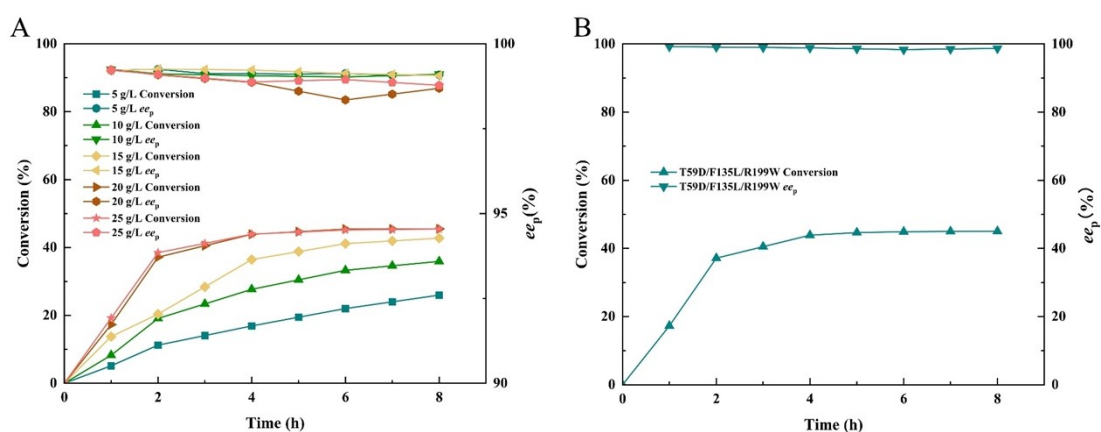

**Figure S18.** The reaction process of desymmetrizing hydrolysis of **1a** by T59D/F135L/R199W. (A) The reaction process of different concentrations of recombinant cells as biocatalyst. (B) The reaction process of 20 g/L recombinant cells as biocatalyst at 3 L scale.

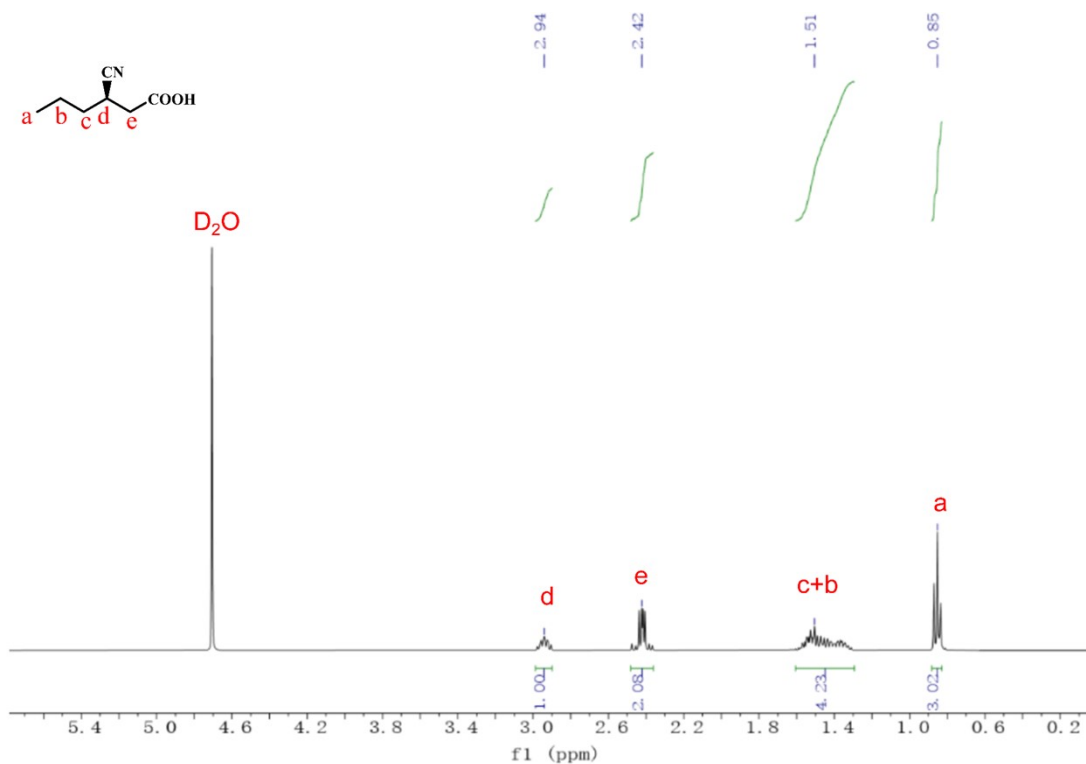

**Figure S19.** <sup>1</sup>H NMR of (*R*)-**2a**. <sup>1</sup>H NMR (400 MHz, D<sub>2</sub>O) δ: 3.00–2.88 (m, 1H), 2.50–2.34 (m, 2H), 1.63–1.27 (m, 4H), 0.85 (t, 3H).

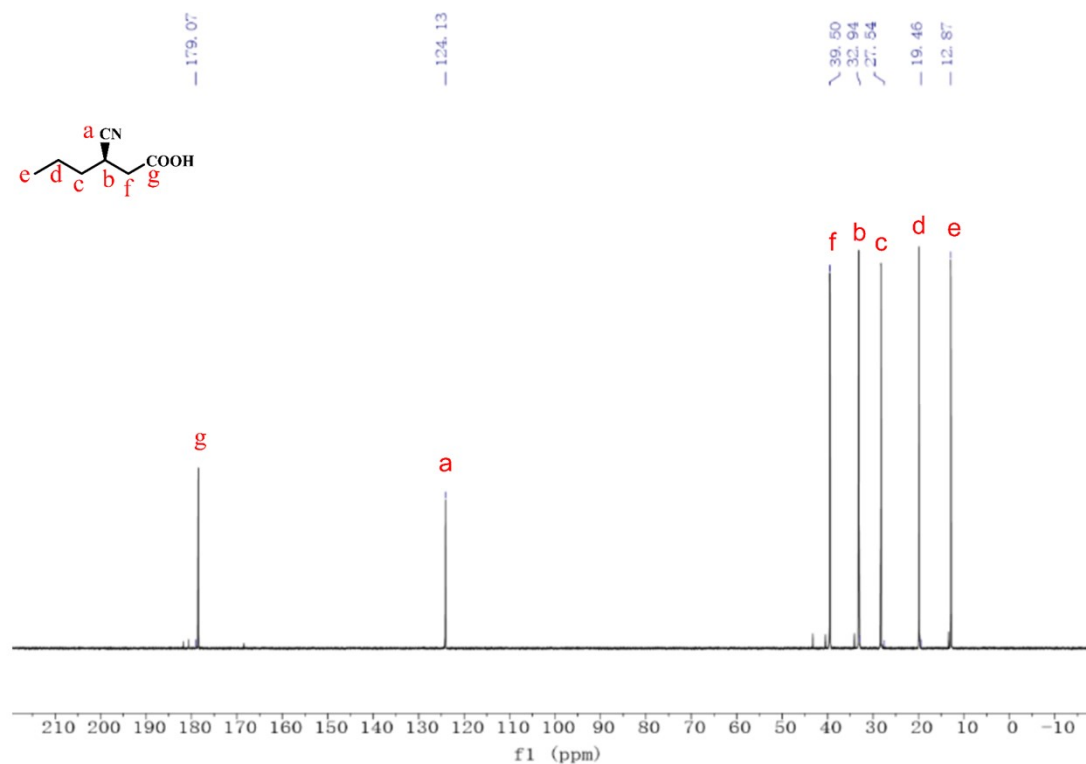

**Figure S20.** <sup>13</sup>C NMR of (*R*)-**2a**. <sup>13</sup>C NMR (400 MHz, D<sub>2</sub>O) δ: 179.07, 124.13, 39.50, 32.94, 27.54, 19.46, 12.87.

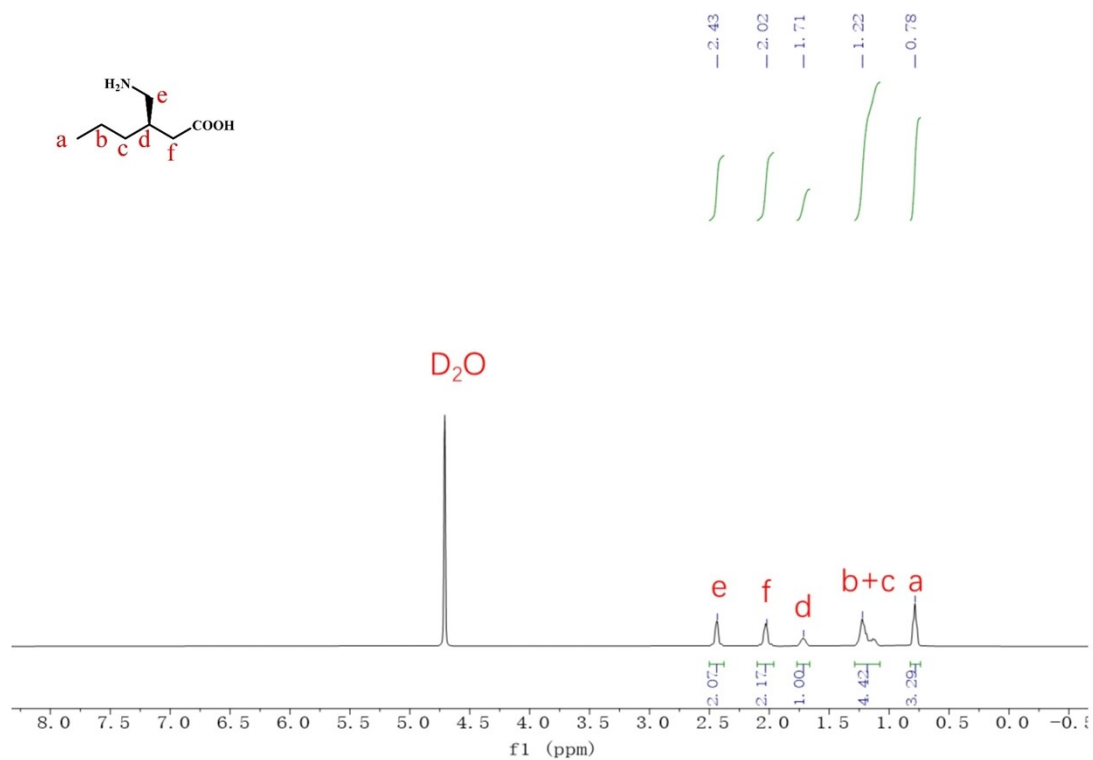

**Figure S21.**  $^1\text{H}$  NMR of **5**.  $^1\text{H}$  NMR (400 MHz,  $\text{D}_2\text{O}$ )  $\delta$ : 2.51–2.37 (m, 2H), 2.02 (d, 2H), 1.71 (m, 1H), 1.22 (m, 2H), 1.13 (m, 2H), 0.78 (t, 3H).

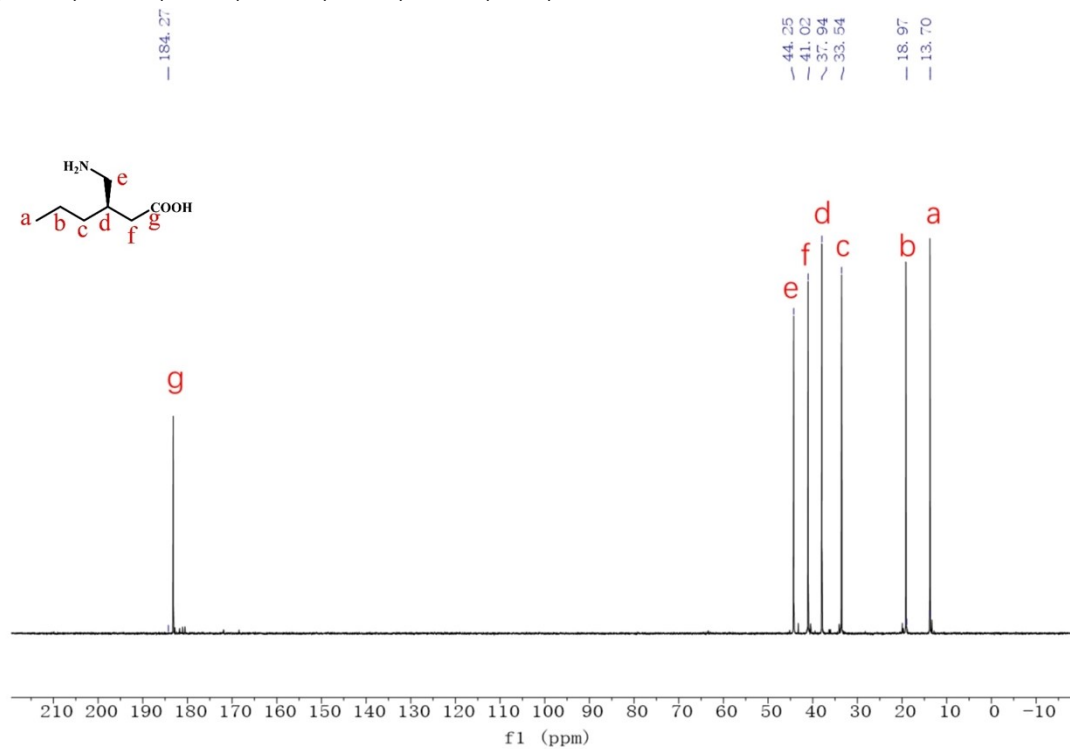

**Figure S22.**  $^{13}\text{C}$  NMR of **5**.  $^{13}\text{C}$  NMR (400 MHz,  $\text{D}_2\text{O}$ )  $\delta$ : 184.27, 44.25, 41.02, 37.94, 33.54, 18.97, 13.70.

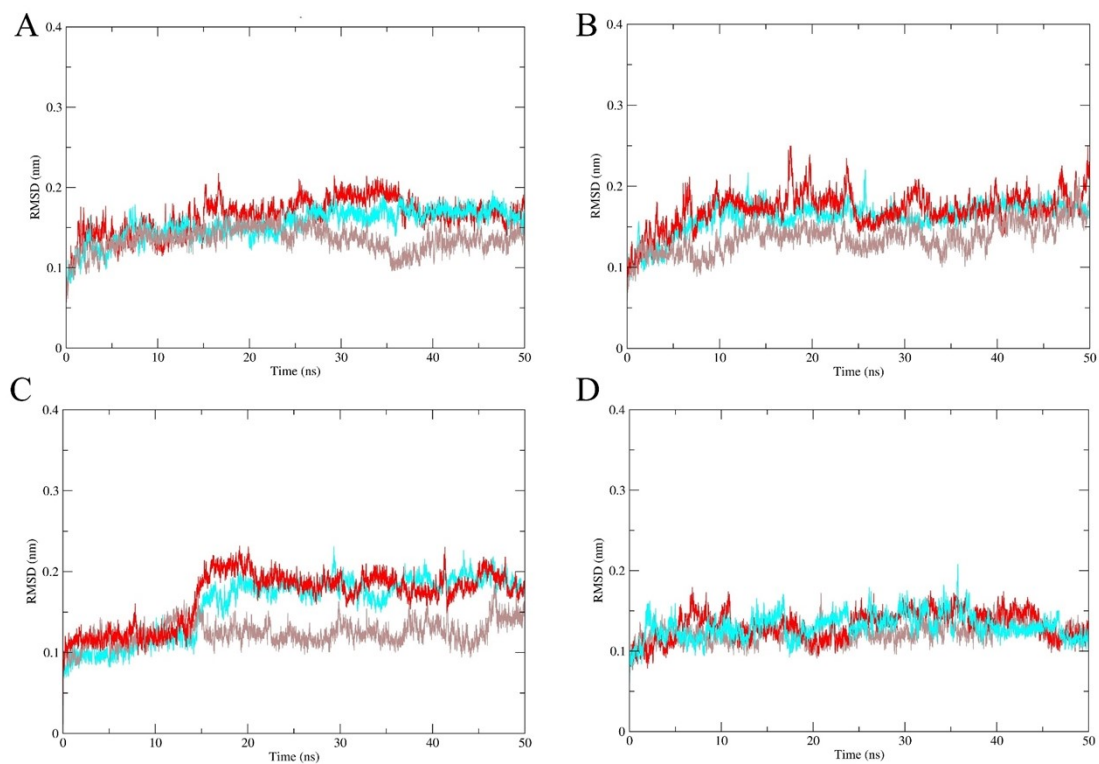

**Figure S23.** RMSD of (*R*)-**1b** binding in WT (A), (*S*)-**1b** binding in WT (B), (*R*)-**1b** binding in T59D/F135L/R199W (C) and (*S*)-**1b** binding in T59D/F135L/R199W (D). The RMSD was calculated from a 50 ns MD simulation. All the MD simulations were repeated three independent times.

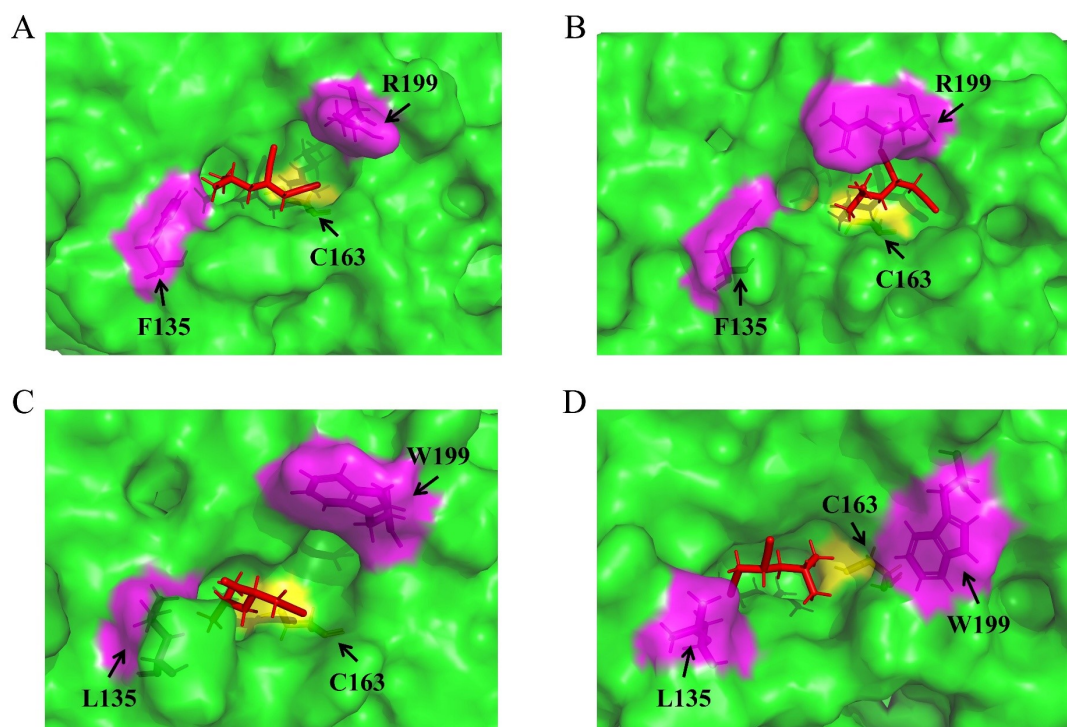

**Figure S24.** Surface diagram of characteristic structure representation of (*R*)-**1b** binding in WT (A), (*S*)-**1b** binding in WT (B), (*R*)-**1b** binding in T59D/F135L/R199W (C) and (*S*)-**1b** binding in T59D/F135L/R199W (D). Mutant residues are shown as magenta sticks and surface. The substrate **1a** is shown as red sticks. The catalytic triad residue C163 is shown as a yellow stick and surface.

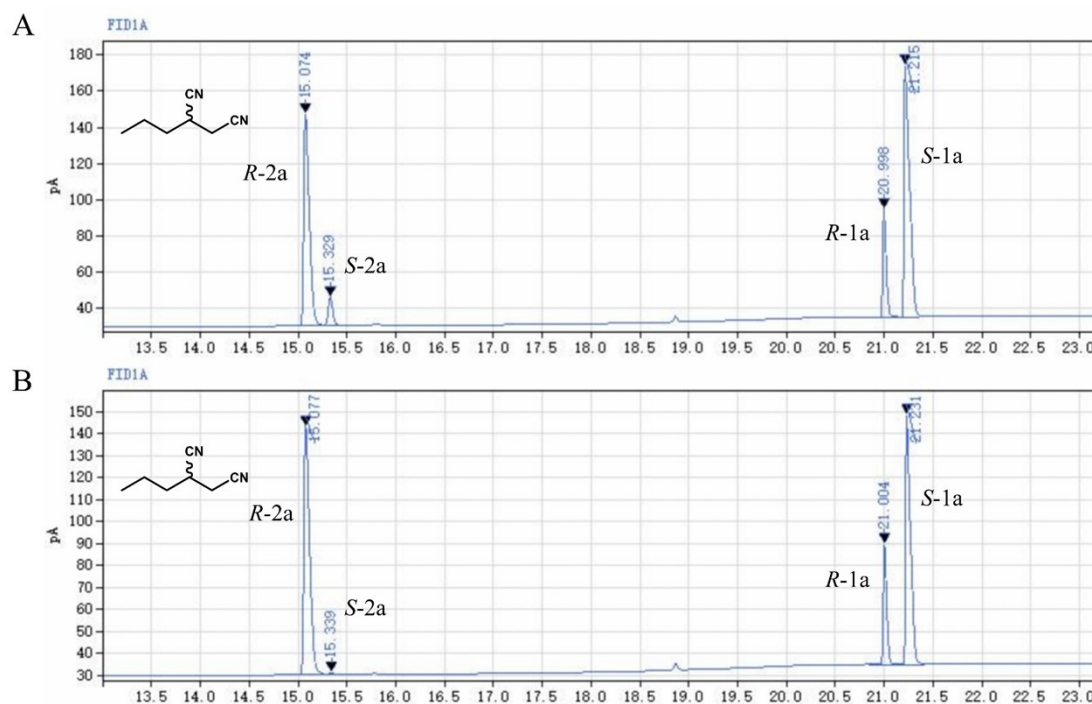

**Figure S25.** GC analysis of the kinetic resolution of **1a** by WT (A) and T59D/F135L/R199W (B). GC-FID analysis was performed on a BGB-175 column (30 m × 0.25 mm, 0.25 μm) with nitrogen as carrier gas. The GC-FID conditions were as follows: injector and detector temperatures at 250 °C; oven temperature held at 120 °C for 12 min, ramped at 10 °C·min<sup>-1</sup> to 200 °C, and held for 5 min.

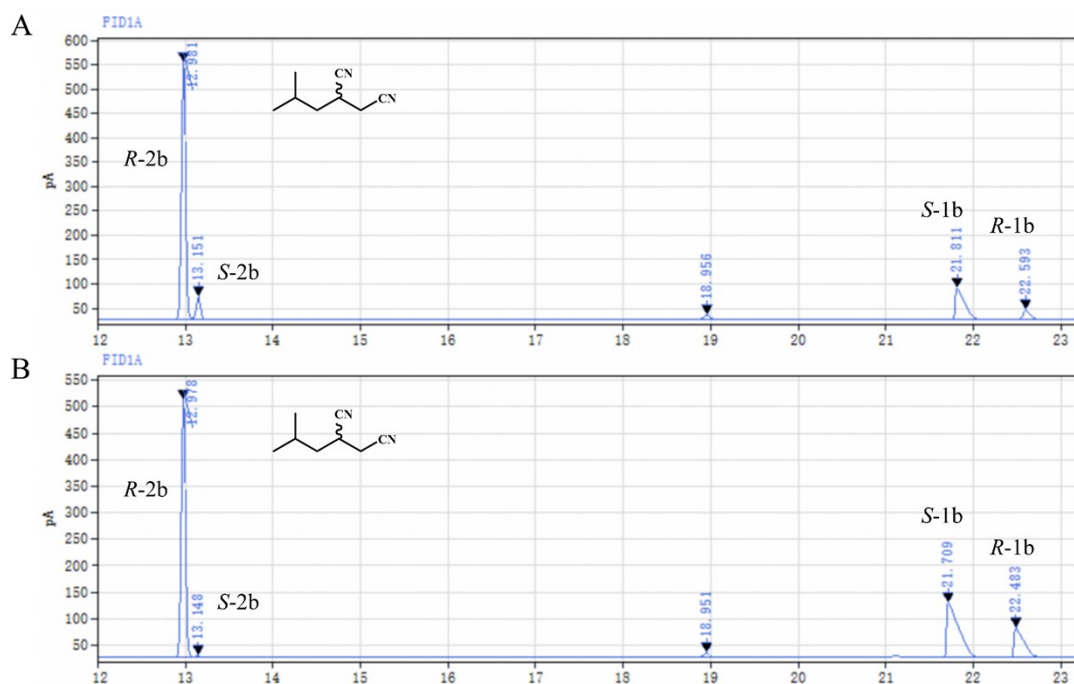

**Figure S26.** GC analysis of the kinetic resolution of **1b** by WT (A) and T59D/F135L/R199W (B). GC-FID analysis was performed on a BGB-174 column (30 m × 0.25 mm, 0.25 μm) with nitrogen as carrier gas. The GC-FID conditions were as follows: injector and detector temperatures at 250 °C; oven temperature held at 120 °C for 15 min, ramped at 10 °C·min<sup>-1</sup> to 170 °C, and held for 10 min, ramped at 10 °C·min<sup>-1</sup> to 200 °C, and held for 7 min.

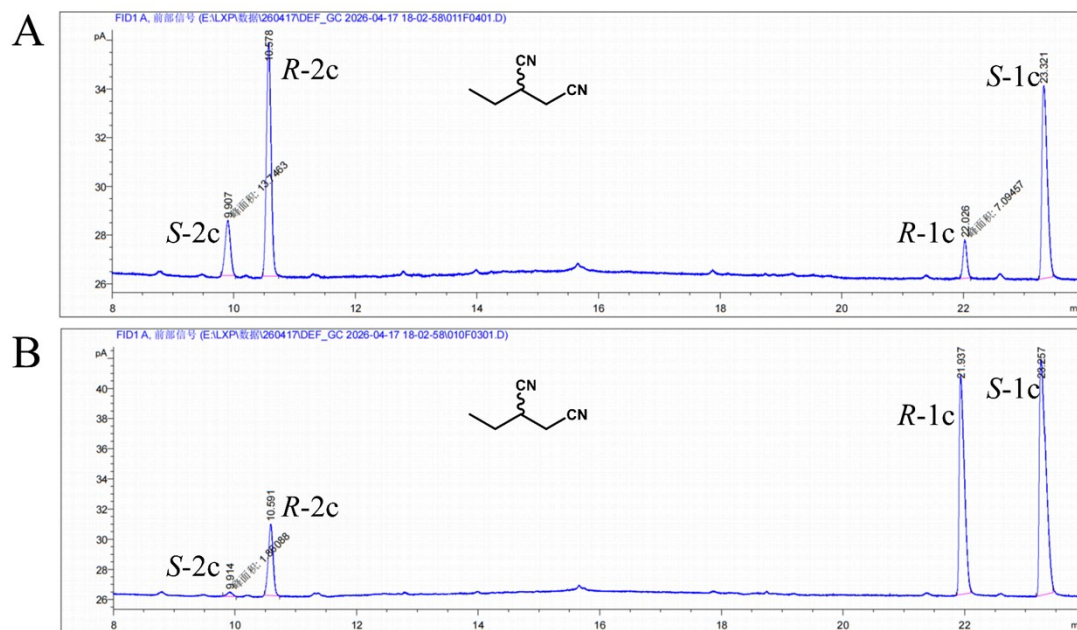

**Figure S27.** GC analysis of the kinetic resolution of 1c by WT (A) and T59D/F135L/R199W (B). GC-FID analysis was performed on a BGB-174 column (30 m × 0.25 mm, 0.25 μm) with nitrogen as carrier gas. The GC-FID conditions were as follows: injector and detector temperatures at 250 °C; oven temperature held at 120 °C for 15 min, ramped at 10 °C·min<sup>-1</sup> to 170 °C, and held for 10 min, ramped at 10 °C·min<sup>-1</sup> to 200 °C, and held for 7 min.

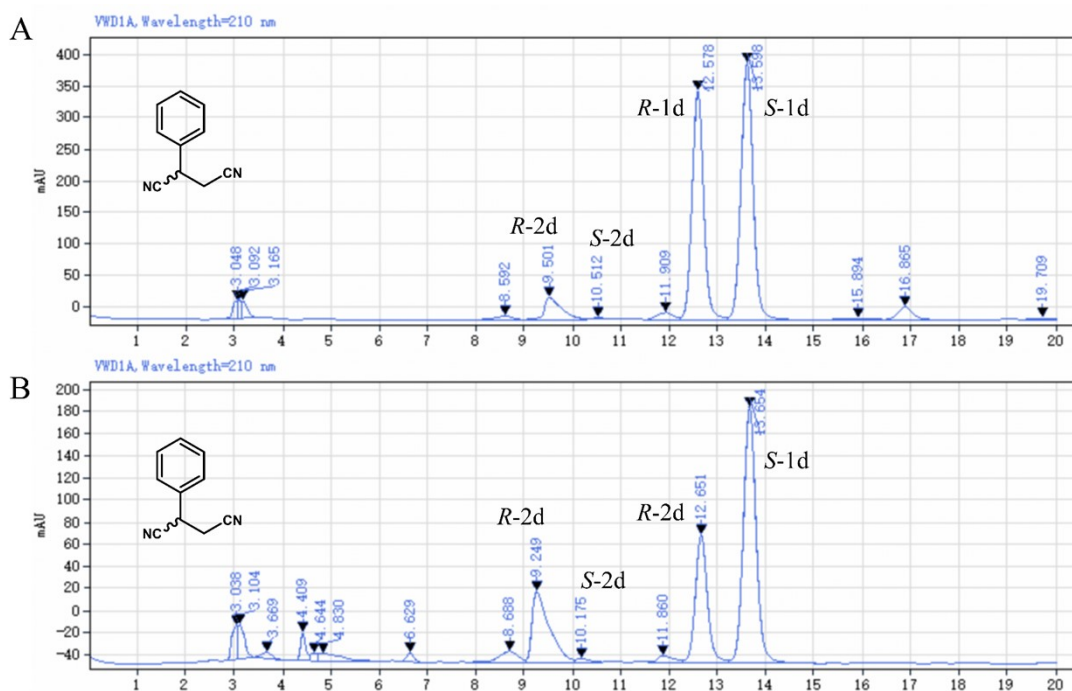

**Figure S28.** HPLC analysis of the kinetic resolution of **1d** by WT (A) and T59D/F135L/R199W (B). Chiral HPLC: DAICEL AD-H, 210 nm, n-hexane/isopropanol = 90:10, flow rate 1 mL/min.

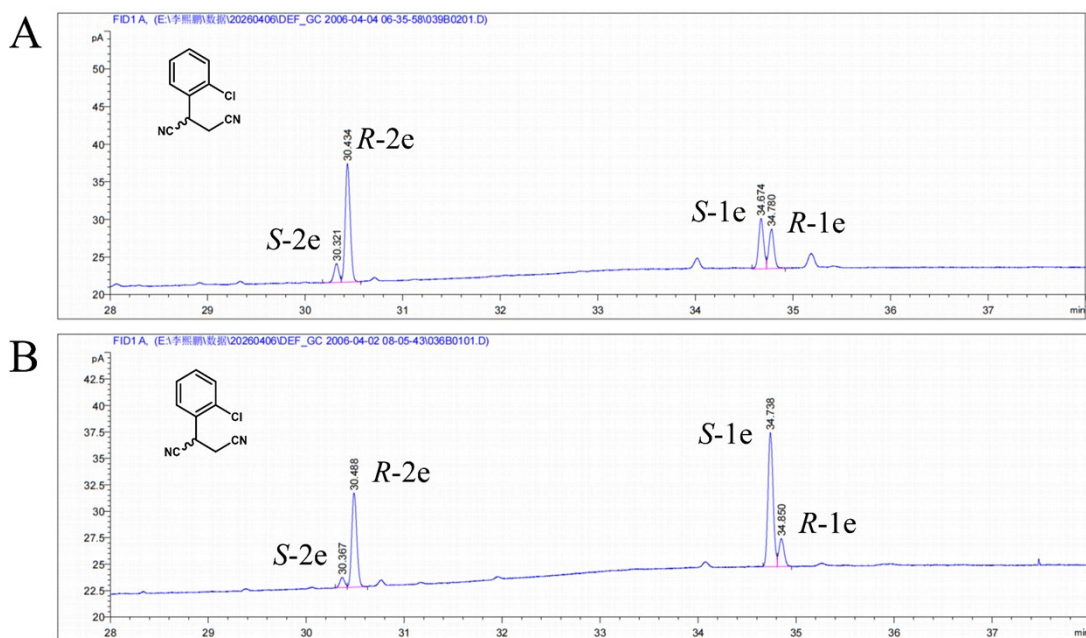

**Figure S29.** GC analysis of the kinetic resolution of **1e** by WT (A) and T59D/F135L/R199W (B). GC-FID analysis was performed on a BGB-175 column (30 m × 0.25 mm, 0.25 μm) with nitrogen as carrier gas. The GC-FID conditions were as follows: injector and detector temperatures at 250 °C; oven temperature held at 80 °C for 5 min, ramped at 5 °C·min<sup>-1</sup> to 220 °C, and held for 10 min.

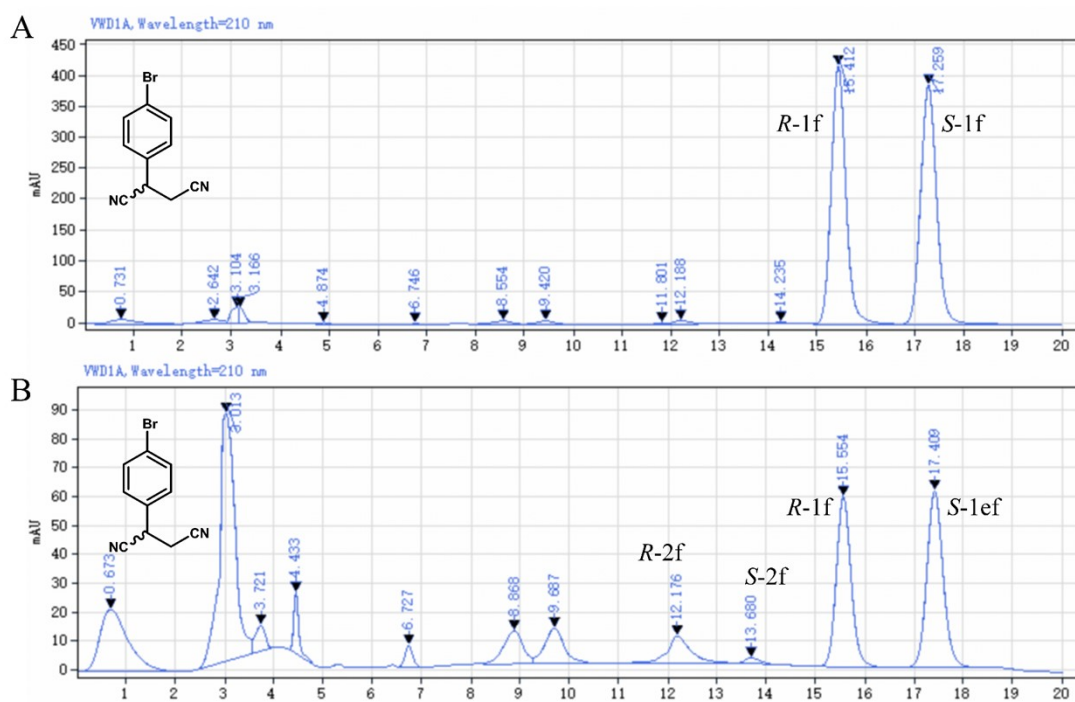

**Figure S30.** HPLC analysis of the kinetic resolution of **1f** by WT (A) and T59D/F135L/R199W (B). Chiral HPLC: DAICEL AD-H, 210 nm, n-hexane/isopropanol = 90:10, flow rate 1 mL/min.

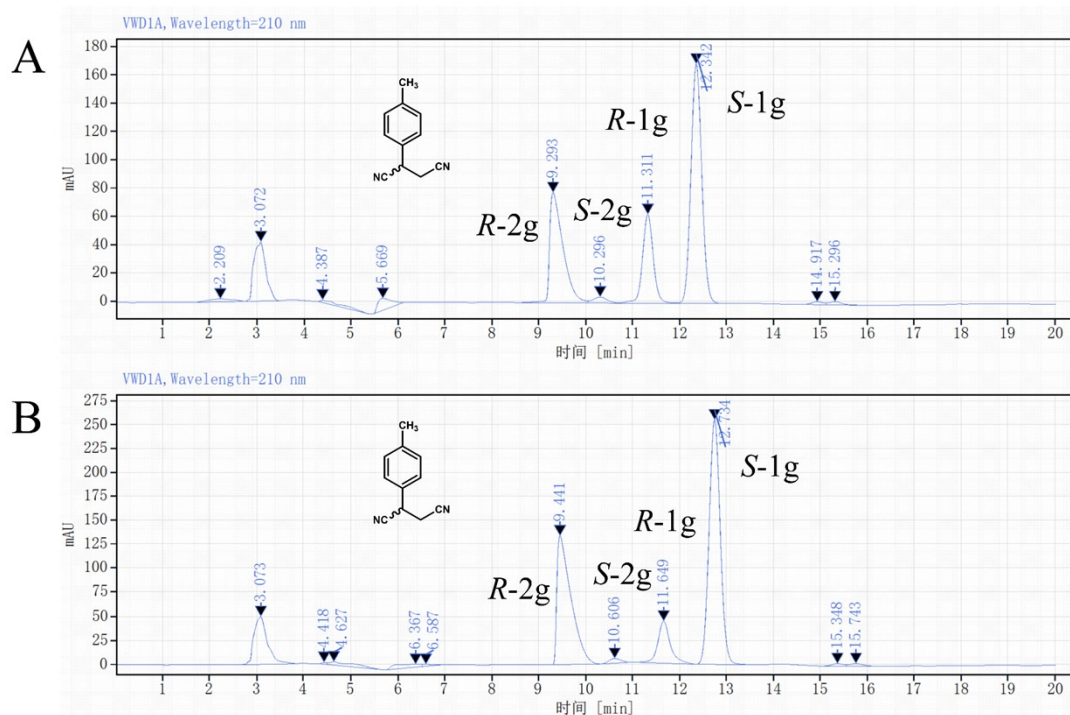

**Figure S31.** HPLC analysis of the kinetic resolution of **1g** by WT (A) and T59D/F135L/R199W (B). Chiral HPLC: DAICEL AD-H, 210 nm, n-hexane/isopropanol = 90:10, flow rate 1 mL/min.

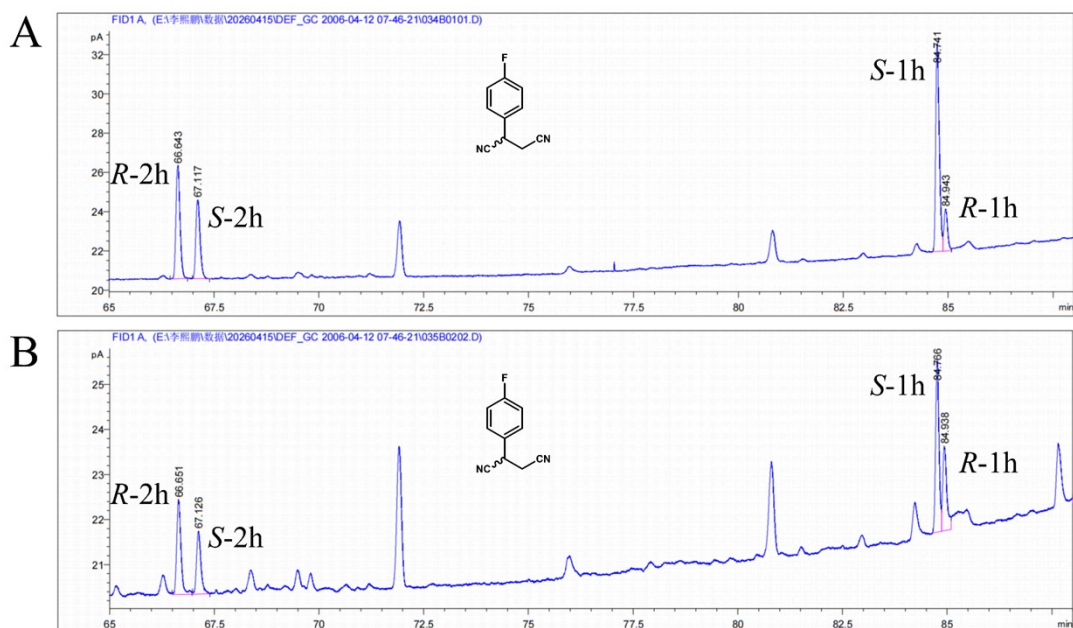

**Figure S32.** GC analysis of the kinetic resolution of **1h** by WT (A) and T59D/F135L/R199W (B). GC-FID analysis was performed on a BGB-175 column (30 m × 0.25 mm, 0.25 μm) with nitrogen as carrier gas. The GC-FID conditions were as follows: injector and detector temperatures at 250 °C; oven temperature held at 60 °C for 10 min, ramped at 2 °C·min<sup>-1</sup> to 220 °C, and held for 10 min.

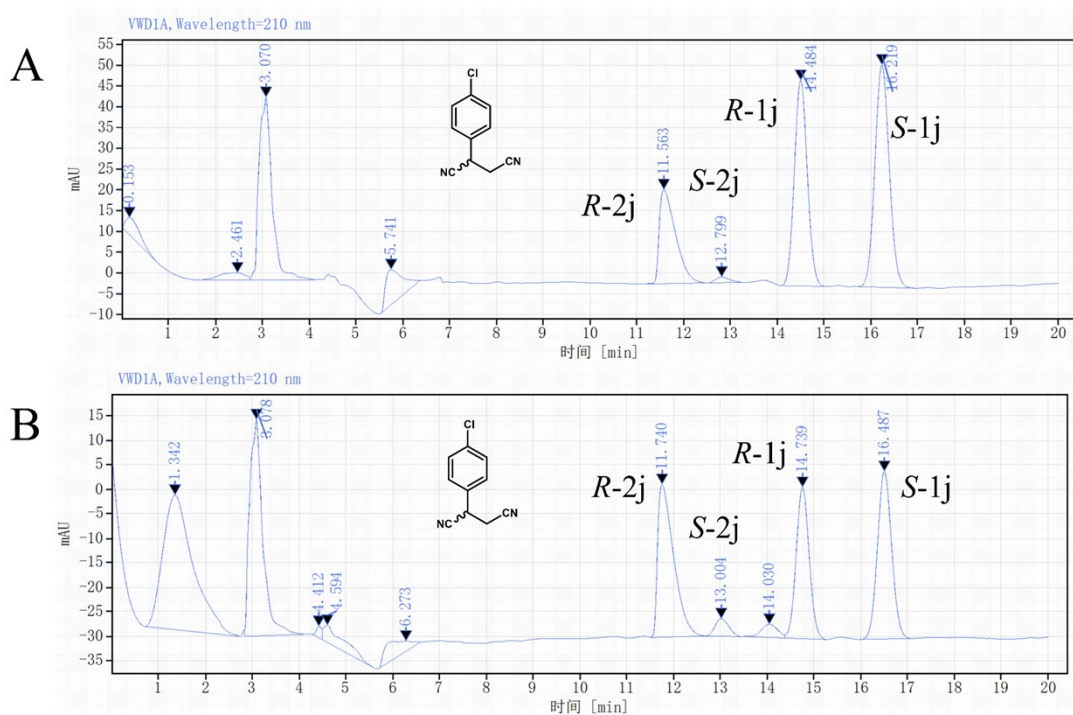

**Figure S33.** HPLC analysis of the kinetic resolution of **1j** by WT (A) and T59D/F135L/R199W (B). Chiral HPLC: DAICEL AD-H, 210 nm, n-hexane/isopropanol = 90:10, flow rate 1 mL/min.

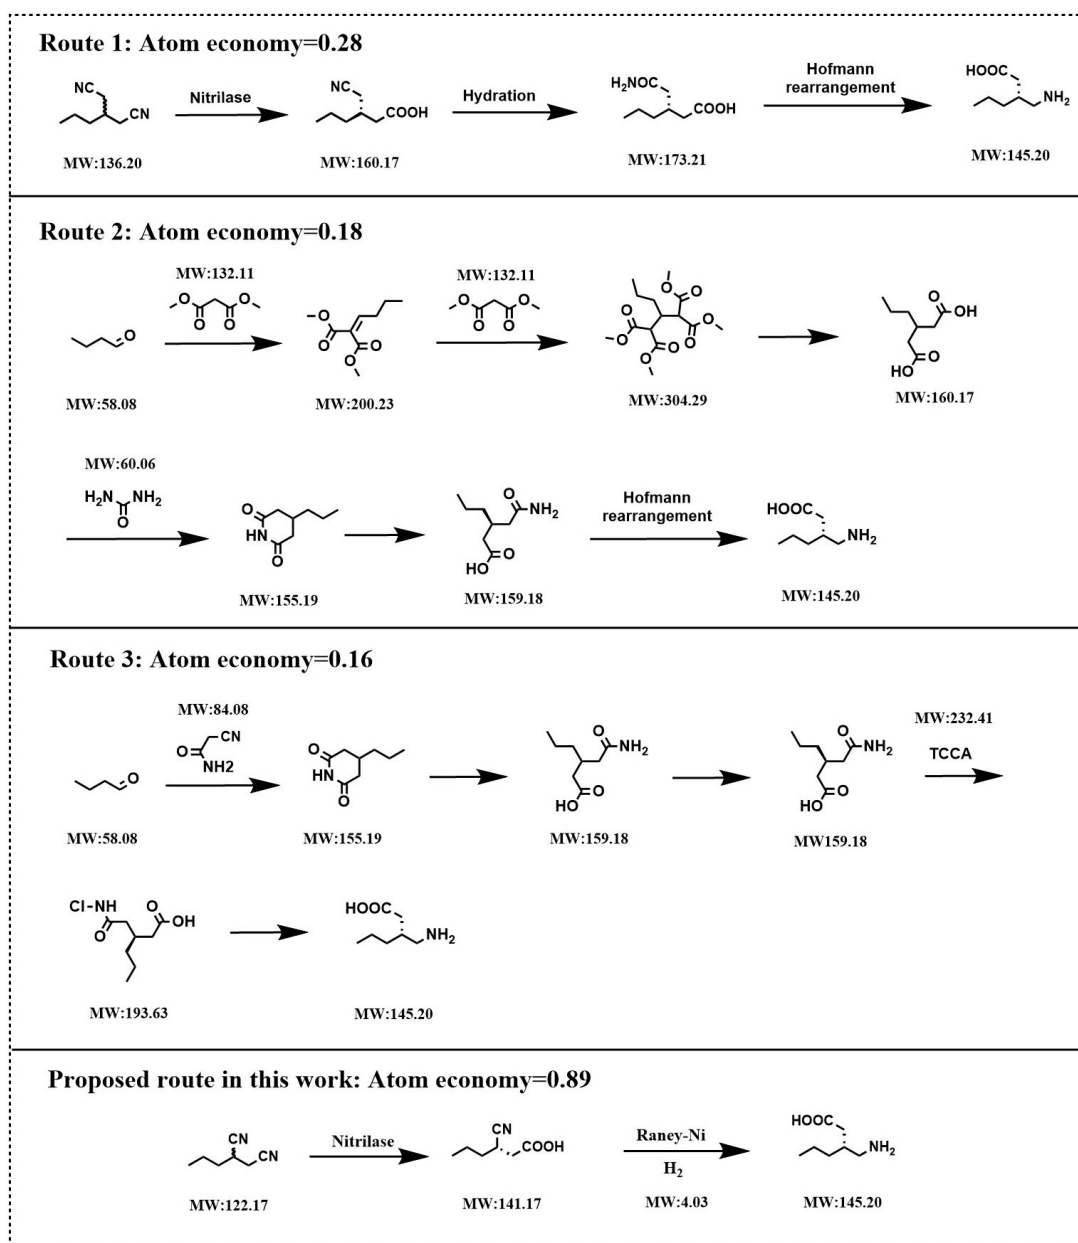

**Figure S34.** Comparison of different synthetic routes for the key intermediate of Brivaracetam. TCCA = trichloroisocyanuric acid.

### The DNA sequence of *PgNIT* and other main variants.

*PgNIT*:

ATGGGTAAAGTTGTCAAAGCCGCTGCTGTTCAATTTTCTCCAGTTCTGTACAGCCGCGAA  
 GCAACCGTAGCAAAGTTCGTACAGAAGATCCACGAAGTGGGTCTGAAAGGCGTGCAATT  
 CGCTACCTTCCCGGAAACCGTTGTCCCGTACTACCCGTATTTGCTGCAGTTCAGACTG  
 GTATCGAGCTGCTGAGCGGTTCCGAACACCTGCGTCTGCTGGAGCAGGCGGTTACTGT  
 TCCTAGCGCGGCTACGGATGCAATCGGTAAAGCTGCTCGTGAAGCAGGTATGGTTGTAT  
 CTATCGGCGTGAACGAGCGCGACGGTGGCAGCTGTACAACACCCAAGTCTGTTTGTAT  
 GCCGATGGCAGCTGATTCAGCGTCGCCGTAATAACCCCAACTCACTTCGAACGTAT  
 GATTTGGGGTCAAGGTGATGGTTCTGGTCTGCGTGCGGTTGATTCCGCCGTGGGCCGC  
 ATTGGTCAGCTGGCGTGTTCGAACATAACAACCCACTGGCCGTTACGCGATGATCGC

TGATGGCGAACAATCCATTCTGCGATGTATCCGGGCAGCGCTTTTGGCGAAGGTTTTG  
CGCAGCGTATGGAAATCAACATTCGTCAGCACGCACTGGAATCCGGCGCGTTCGTAGTC  
AACGCAACCGCATGGCTGGATGCGGATCAGCAGGCACAAATTATGAAAGACACCGGCT  
GCGGCATTGGTCCAATTAGCGGTGGTTGTTTCACCACCATTGTTTCCCGGACGGTATG  
CTGATGGCTGAACCGCTGCGCTCTGGTGAGGGCGAGGTCATCGTTGACCTGGACTTTG  
CACAGATCGATCGTCGTAATGCTGATGGACGCTGCCGGTCATTACAACCGTCCGGAA  
CTGCTGTCTCTGATGATCGATCGTACCCCTACCGCGCATGTACATGAACGTGCGCCGCA  
CTCCCTGCCGGTAAGCGACAAGCGGACGACGACGTGCGCACCCAAGCGGCTGCAGTC  
GCGGGTTCCCGCCTCGAGATT

F135L:

ATGGGTAAAGTTGTCAAAGCCGCTGCTGTTCAATTTTCTCCAGTTCTGTACAGCCGCGAA  
GCAACCGTAGCAAAAAGTCGTACAGAAGATCCACGAACTGGGTCTGAAAGGCGTGCAATT  
CGCTACCTTCCCGGAAACCGTTGTCCCGTACTACCCGTATTTGCTGCAGTTCAGACTG  
GTATCGAGCTGCTGAGCGGTTCCGAACACCTGCGTCTGCTGGAGCAGGCGGTTACTGT  
TCCTAGCGCGGCTACGGATGCAATCGGTAAAGCTGCTCGTGAAGCAGGTATGGTTGTAT  
CTATCGGCGTGAACGAGCGCGACGGTGGCAGCTGTACAACACCCAACCTGCTGTTTGTAT  
GCCGATGGCACGCTGATTCAGCGTCGCCGTAAAATCACCCCAACTCACCTGGAACGTAT  
GATTTGGGGTCAGGGTGATGGTTCTGGTCTGCGTGCGGTTGATTCCGCCGTGGGCCGC  
ATTGGTCAGCTGGCGTGTTTCGAACATAACAACCCACTGGCCCGTTACGCGATGATCGC  
TGATGGCGAACAATCCATTCTGCGATGTATCCGGGCAGCGCTTTTGGCGAAGGTTTTG  
CGCAGCGTATGGAAATCAACATTCGTCAGCACGCACTGGAATCCGGCGCGTTCGTAGTC  
AACGCAACCGCATGGCTGGATGCGGATCAGCAGGCACAAATTATGAAAGACACCGGCT  
GCGGCATTGGTCCAATTAGCGGTGGTTGTTTCACCACCATTGTTTCCCGGACGGTATG  
CTGATGGCTGAACCGCTGCGCTCTGGTGAGGGCGAGGTCATCGTTGACCTGGACTTTG  
CACAGATCGATCGTCGTAATGCTGATGGACGCTGCCGGTCATTACAACCGTCCGGAA  
CTGCTGTCTCTGATGATCGATCGTACCCCTACCGCGCATGTACATGAACGTGCGCCGCA  
CTCCCTGCCGGTAAGCGACAAGCGGACGACGACGTGCGCACCCAAGCGGCTGCAGTC  
GCGGGTTCCCGCCTCGAGATT

F135L/R199W:

ATGGGTAAAGTTGTCAAAGCCGCTGCTGTTCAATTTTCTCCAGTTCTGTACAGCCGCGAA  
GCAACCGTAGCAAAAAGTCGTACAGAAGATCCACGAACTGGGTCTGAAAGGCGTGCAATT  
CGCTACCTTCCCGGAAACCGTTGTCCCGTACTACCCGTATTTGCTGCAGTTCAGACTG  
GTATCGAGCTGCTGAGCGGTTCCGAACACCTGCGTCTGCTGGAGCAGGCGGTTACTGT  
TCCTAGCGCGGCTACGGATGCAATCGGTAAAGCTGCTCGTGAAGCAGGTATGGTTGTAT  
CTATCGGCGTGAACGAGCGCGACGGTGGCAGCTGTACAACACCCAACCTGCTGTTTGTAT  
GCCGATGGCACGCTGATTCAGCGTCGCCGTAAAATCACCCCAACTCACCTGGAACGTAT  
GATTTGGGGTCAGGGTGATGGTTCTGGTCTGCGTGCGGTTGATTCCGCCGTGGGCCGC  
ATTGGTCAGCTGGCGTGTTTCGAACATAACAACCCACTGGCCCGTTACGCGATGATCGC  
TGATGGCGAACAATCCATTCTGCGATGTATCCGGGCAGCGCTTTTGGCGAAGGTTTTG  
CGCAGTGGATGGAAATCAACATTCGTCAGCACGCACTGGAATCCGGCGCGTTCGTAGTC  
AACGCAACCGCATGGCTGGATGCGGATCAGCAGGCACAAATTATGAAAGACACCGGCT

GCGGCATTGGTCCAATTAGCGGTGGTTGTTTCACCACCATTGTTTCCCCGGACGGTATG  
CTGATGGCTGAACCGCTGCGCTCTGGTGAGGGCGAGGTCATCGTTGACCTGGACTTTG  
CACAGATCGATCGTCGTAAAATGCTGATGGACGCTGCCGGTCATTACAACCGTCCGGAA  
CTGCTGTCTCTGATGATCGATCGTACCCCTACCGCGCATGTACATGAACGTGCGCCGCA  
CTCCCTGCCGGTAAGCGACAAAGCGGACGACGACGTGCGCACCCAAGCGGCTGCAGTC  
GCGGGTCCCCGCCTCGAGATT

F135L/R199W/T59D:

ATGGGTAAAGTTGTCAAAGCCGCTGCTGTTCAATTTTCTCCAGTTCTGTACAGCCGCGAA  
GCAACCGTAGCAAAAGTCGTACAGAAGATCCACGAACTGGGTCTGAAAGGCGTGCAATT  
CGCTACCTCCCCGGAACCGTTGTCCCGTACTACCCGTATTTGCTGCAGTTCAGGACG  
GTATCGAGCTGCTGAGCGGTTCCGAACACCTGCGTCTGCTGGAGCAGGCGGTTACTGT  
TCTAGCGCGGCTACGGATGCAATCGGTAAAGCTGCTCGTGAAGCAGGTATGGTTGAT  
CTATCGGCGTGAACGAGCGCGACGGTGGCAGCTGTACAACACCCAACCTGCTGTTTGAT  
GCCGATGGCAGCTGATTCAGCGTCGCCGTAAAATCACCCCAACTCACCTGGAACGTAT  
GATTTGGGGTCAGGGTGATGGTTCTGGTCTGCGTGCGGTTGATTCCGCCGTGGGCCGC  
ATTGGTCAGCTGGCGTGTTCGAACATAACAACCCACTGGCCCGTTACGCGATGATCGC  
TGATGGCGAACAAATCCATTCTGCGATGTATCCGGGCAGCGCTTTTGGCGAAGTTTTG  
CGCAGTGGATGGAATCAACATTCGTCAGCACGCACTGGAATCCGGCGCGTTCGTAGTC  
AACGCAACCGCATGGCTGGATGCGGATCAGCAGGCACAAATTATGAAAGACACCGGCT  
GCGGCATTGGTCCAATTAGCGGTGGTTGTTTCACCACCATTGTTTCCCCGGACGGTATG  
CTGATGGCTGAACCGCTGCGCTCTGGTGAGGGCGAGGTCATCGTTGACCTGGACTTTG  
CACAGATCGATCGTCGTAAAATGCTGATGGACGCTGCCGGTCATTACAACCGTCCGGAA  
CTGCTGTCTCTGATGATCGATCGTACCCCTACCGCGCATGTACATGAACGTGCGCCGCA  
CTCCCTGCCGGTAAGCGACAAAGCGGACGACGACGTGCGCACCCAAGCGGCTGCAGTC  
GCGGGTCCCCGCCTCGAGATT
